1 **Title: Forecasting COVID-19 pandemic Severity in Asia**

2 **Running Title:** Forecasting COVID-19 evolution in Asia

3 **Authors:** Elinor Aviv-Sharon\* and Asaph Aharoni

4 **Affiliations:** Department of Plant and Environmental Sciences, Weizmann Institute of  
5 Science, Rehovot, 7610001, Israel

6 \* Corresponding author

7 **Address for correspondence:** Elinor Aviv-Sharon, Department of Plant and  
8 Environmental Sciences, Weizmann Institute of Science, Rehovot, 7610001, Israel;  
9 phone number: +972-8-934-2161; email: [elinor.aviv@weizmann.ac.il](mailto:elinor.aviv@weizmann.ac.il)

10

11 **Abstract**

12 Four months into the ongoing novel coronavirus disease 2019 (COVID-19) pandemic,  
13 this work provides a simple and direct projection of the outbreak spreading potential  
14 and the pandemic cessation dates in China, Iran, the Philippines and Taiwan, using the  
15 generalized logistic model (GLM). The short-term predicted number of cumulative  
16 COVID-19 cases matched the confirmed reports of those who were infected across  
17 the four countries, suggesting GLM as a valuable tool for characterizing the  
18 transmission dynamics process and the trajectory of COVID-19 pandemic along with  
19 the impact of interventions.

20

21 **Keywords:** COVID-19; SARS-CoV-2; emerging infectious diseases; forecasting;  
22 prediction; generalized logistic model; Richards model; epidemic modeling

23

24

25 **NOTE:** This preprint reports new research that has not been certified by peer review and should not be used to guide clinical practice.

## 26 **Introduction**

27 Coronavirus disease 2019 (COVID-19), caused by the novel severe acute respiratory  
28 syndrome coronavirus 2 (SARS-CoV-2) was identified in China, in November 2019,  
29 declared to be a public health emergency of international concern in two months, and  
30 recognized as a pandemic on 11<sup>th</sup> March 2020. As of 10<sup>th</sup> April 2020, approximately  
31 1.7 million cases of COVID-19 have been reported in 210 countries and territories,  
32 resulting in approximately 95,800 deaths. Emerging infectious diseases (EID), which  
33 appear for the first time, or that may have existed previously but is rapidly spreading,  
34 are possibly the deadliest and continue to challenge human health.

35 As the world races to find a vaccine or a treatment to combat the pandemic, many  
36 concerns arise about the outbreak severity, particularly the potential number of  
37 infected people. Hence, it is of a great importance to estimate the outbreak evolution  
38 using epidemiology models. Here, the epidemiological dataset of confirmed cases  
39 with COVID-19 in China, Iran, the Philippines and Taiwan, as of 10<sup>th</sup> April 2020, was  
40 analyzed, using the generalized logistic model (GLM), also known as Richards'  
41 model. This empirical function has made many remarkable coincidences with real  
42 SARS, Zika and Ebola epidemic data for real-time prediction of outbreak  
43 development (1–4). Early assessment of the severity of infection and transmissibility  
44 can help quantify COVID-19 pandemic potential and anticipate the likely number of  
45 infected people by the end of the epidemics.

## 46 **Data and methods**

47 Specific countries were selected as denoting different COVID-19 incidence scales.  
48 China and Iran, the two major centers of COVID-19 outbreak in eastern and southern  
49 Asia, respectively with tens of thousands of cases; the Philippines, a representative of  
50 an archipelagic country with thousands of cases, and Taiwan, with only hundreds of

51 cases. For each country, the officially reported data on COVID-19 daily cases from  
52 the onset of the outbreak to April 10<sup>th</sup>, 2020 were collected from governmental or  
53 health authorities' websites (Appendix Table, Figure). To allow outbreak projection,  
54 the data from the early phase of the outbreak (35-40 days) were fitted with the GLM  
55 as described previously (1,5). Briefly, this approach enables the evaluation of the  
56 cumulative number of COVID-19 cases, represented by  $Y(t)$ . The dynamics of  $Y$ , in  
57 period  $t$ , can be expressed as:

58

$$Y(t) = \frac{K}{(1 + e^{-r(t-t_m)})^{\frac{1}{\alpha}}}$$

59 Where  $K$  is the upper asymptote, or the maximum cumulative case incidence,  $r$  is the  
60 intrinsic growth rate and  $t_m$  is the turning point, the time where maximum number of  
61 cases per day occur. The model predicts that cumulative COVID-19 case incidence  
62 follows an S-shaped curve and gradually reaches  $K$ . Not a single new COVID-19 case  
63 emerging within 3 consecutive months defines the end of the epidemic (1).

64 The basic reproduction number of COVID-19,  $R_0$ , the expected number of secondary  
65 cases produced by a single infection was estimated as  $R_0 = e^{rT}$ , where  $T$  is the mean  
66 serial interval; the time that elapses between onset of symptoms in the primary case  
67 and onset of symptoms of the secondary case.

68 The model should conform to several assumptions: first, as the number of tests  
69 conducted affects the reported number of daily cases, similar number of individuals  
70 are tested daily. Secondly, cases are not imported from outside the country. Thirdly,  
71 the model does not consider human behavior and is conditional on the assumption that  
72 public gatherings are highly limited, allowing the epidemic to follow its natural  
73 course. Likewise, implementation of intervention measures, such as enhanced

74 hygiene, isolation, contact tracing, restrictions on social contacts and migration by air  
75 or train, are maintained continuously.

## 76 **Results and Discussion**

77 Corresponding to the basic premise of GLM, the cumulative COVID-19 cases curve  
78 of each country consists of a single peak of high incidence, resulting in a sigmoid  
79 curve with a single turning point (Figure). For all localities, high correlations between  
80 observed and predicted incidence were found ( $R^2 > 0.99$ ,  $p \text{ value} < 2.2e^{-16}$ ).

81 To evaluate the forecasting performance of the model, the total number of cases on  
82 April 10<sup>th</sup> were estimated based on the observed incidence during the initial stage of  
83 the pandemic. A subset data of 35 days was used for China (January 21<sup>st</sup> to February  
84 24<sup>th</sup> 2020), Iran (February 26<sup>th</sup> to March 31<sup>st</sup> 2020) and the Philippines (February 19<sup>th</sup>  
85 to March 24<sup>th</sup> 2020). In Taiwan, due to a smaller scale of cases, dataset of 40 days  
86 (February 25<sup>th</sup> to April 4<sup>th</sup> 2020) was required for optimal fit to the model.

87 Forecasting the total number of cases on April 10<sup>th</sup> 2020 (Figure), was done 46, 10, 17  
88 and 6 consecutive days ahead for China, Iran, the Philippines and Taiwan,  
89 respectively. In all cases, the predicted cumulative number of cases was similar to the  
90 one officially reported (Table). The predicted number was 81797 for China, 68225 for  
91 Iran, 4430 for the Philippines and 425 for Taiwan, while the observed total number of  
92 cases was 81953, 68192, 4195 and 382, respectively. The maximum predicted  
93 cumulative incidence,  $K$ , was estimated to be 81797 for China, 97576 for Iran, 6300  
94 for the Philippines, and 479 for Taiwan [see Table for 95% confidence interval (CI)].

95 The earliest time for the current COVID-19 pandemic to cease, was evaluated to  
96 occur after 73 days (April 2<sup>nd</sup>) in China, 147 days (July 21<sup>st</sup>) in Iran, 122 days (June  
97 19<sup>th</sup>) in the Philippines, and 80 days (May 14<sup>th</sup>) in Taiwan. A mean serial interval of  
98 5.8 days (6) was used to calculate  $R_0$ , the basic reproduction number of COVID-19

99 infections.  $R_0$  estimates were 3.59, 1.86, 2.99 and 2.26 in China, Iran, the Philippines  
100 and Taiwan, respectively, similar to those published previously (7) and to that of  
101 SARS (8). These early stages  $R_0$  are likely to decrease with control measurements  
102 policies continuation. Indeed, predicting COVID-19 dynamics based on its initial  
103 growth phase, revealed that the turning point of each country has occurred closer to  
104 the lower limit of the 95% CI and even earlier than expected, due to the control  
105 measurements effectiveness. The turning point was estimated as day  $19.4 \pm 0.27$  in  
106 China,  $37.1 \pm 3.6$  in Iran,  $47.4 \pm 11.6$  in the Philippines and  $31.2 \pm 1.5$  in Taiwan,  
107 whereas the observed highest number of daily cases in China (14108), Iran (3186), the  
108 Philippines (538) and Taiwan (27) has occurred on day 23, 34, 42, and 23,  
109 respectively (Table).

110 Forecasting COVID-19 pandemic is challenging in the context of an outbreak caused  
111 by novel pathogen for which its natural history and modes of transmission are  
112 unknown. Since the GLM is trained on the existing data and is designed to fit the  
113 development of epidemic curves, rather than EID estimation only, it could provide a  
114 good fit to the limited available COVID-19 epidemiological data to characterize the  
115 transmission dynamics process and the trajectory of COVID-19 pandemic along with  
116 the impact of interventions (9). This prediction is conditional to intervention measures  
117 continuation. Changes of the current policies or human behavior may affect the actual  
118 contact rate and the subsequent development of the epidemic. Additionally, testing  
119 kits deficiency can lead to poor diagnosis and incomplete data, which may implicate  
120 the model robustness. Even so, forecasting epidemic size and peak time may help  
121 clarify what the future holds, and could be useful to make long-term strategic  
122 decisions regarding the distribution of testing and treatment facilities that may be

123 required, and may be helpful to assess the extent of protective and medical equipment  
124 needed for the near future.

## 125 **Acknowledgments**

126 We thank the Adelis Foundation, Leona M. and Harry B. Helmsley Charitable Trust,  
127 Jeanne and Joseph Nissim Foundation for Life Sciences, Tom and Sondra Rykoff  
128 Family Foundation Research and the Raymond Burton Plant Genome Research Fund  
129 for supporting the AA lab activity. A.A. is the incumbent of the Peter J. Cohn  
130 Professorial Chair. The authors report no funding related to this research and no  
131 competing interests.

## 132 **References**

- 133 1. Zhou G, Yan G. Severe Acute Respiratory Syndrome Epidemic in Asia. *Emerg*  
134 *Infect Dis.* 2003;9(12):1608–10.
- 135 2. Heisey DM. SARS Epidemiology Modeling. *Emerg Infect Dis.*  
136 2004;10(6):1165–8.
- 137 3. Smirnova A, Simonsen L, Viboud C. Using Phenomenological Models to  
138 Characterize Transmissibility and Forecast Patterns and Final Burden of Zika  
139 Epidemics. *PLOS Curr.* 2016;8:1–9.
- 140 4. Chowell G, Viboud C, Simonsen L, Merler S, Vespignani A. Perspectives on  
141 model forecasts of the 2014 – 2015 Ebola epidemic in West Africa : lessons  
142 and the way forward. *BMC Med.* 2017;1–8.
- 143 5. Hsieh Y. Richards Model : A Simple Procedure for Real-time Prediction of  
144 Outbreak Severity. *Model Dyn Infect Dis.* 2009;(May):216–136.
- 145 6. He X, Lau EHY, Wu P, Deng X, Wang J, Hao X, et al. Temporal dynamics in  
146 viral shedding and transmissibility of COVID-19. *Nat Med.* 2020;

- 147 7. Zhao S, Lin Q, Ran J, Musa SS, Yang G. Preliminary estimation of the basic  
148 reproduction number of novel coronavirus (2019-nCoV) in China, from 2019  
149 to 2020: A data-driven analysis in the early phase of the outbreak. *Int J Infect*  
150 *Dis.* 2020;92:214–7.
- 151 8. Liu Y, Gayle AA, Wilder-smith A, Rocklöv J. The reproductive number of  
152 COVID-19 is higher compared to SARS coronavirus. *J Travel Med.*  
153 2020;27(2):1–4.
- 154 9. Wang X, Wu J, Yang Y. Richards model revisited : Validation by and  
155 application to infection dynamics. *J Theor Biol.* 2012;313:12–9.

156

157 **Figure Legend.** The generalized logistic growth model-predicted size of the COVID-  
158 19 pandemic in China, Iran, the Philippines and Taiwan. On the left: the daily number  
159 of new confirmed COVID-19 cases. On the right: the observed (black circles) and the  
160 model-fitted and predicted cumulative cases (grey solid line) over time. The grey  
161 circle denotes the predicted number of cumulative cases as of 10 April 2020.

162

163

164

165

166

167

168

**Table. The generalized logistic growth model estimates of COVID-19 pandemic**

| Country         | R <sup>2*</sup> | r    | R <sub>0</sub> | t <sub>m</sub> projected | t <sub>m</sub> observed             | Maximum No. of cases (95% CI <sup>†</sup> ) | Pandemic cessation date          | 10 April projected No. of cases | 10 April observed No. of cases |
|-----------------|-----------------|------|----------------|--------------------------|-------------------------------------|---------------------------------------------|----------------------------------|---------------------------------|--------------------------------|
| China           | 0.997           | 0.22 | 3.59           | 19.4±0.27                | Day 23 (February 12 <sup>th</sup> ) | 81797±1445                                  | Day 73 (April 2 <sup>nd</sup> )  | 81797                           | 81953                          |
| Iran            | 0.995           | 0.1  | 1.86           | 37.1±3.6                 | Day 34 (March 30 <sup>th</sup> )    | 97576±22098                                 | Day 147 (July 21 <sup>st</sup> ) | 68225                           | 68192                          |
| The Philippines | 0.995           | 0.18 | 2.99           | 47.4±11.6                | Day 42 (March 31 <sup>st</sup> )    | 6300±11630                                  | day 122 (June 19 <sup>th</sup> ) | 4430                            | 4195                           |
| Taiwan          | 0.99            | 0.14 | 2.26           | 31.2±1.5                 | Day 23 (March 20 <sup>th</sup> )    | 479±44                                      | day 80 (May 14 <sup>th</sup> )   | 425                             | 382                            |

169

170 r, the intrinsic growth rate during the exponential phase; R<sub>0</sub>, the basic reproduction number; t<sub>m</sub>, the turning point of the model, the

171 date in the brackets indicates the actual day where the maximum number of cases has occurred.

172 \*. Pearson's correlation goodness-of-fit of the model, p value<2.2e<sup>-16</sup>

173 †.CI, confidence interval

174

**Appendix Table. Daily number of new reported COVID-19 cases in China, Iran, the Philippines and Taiwan.**

| Date (yyyy-mm-dd) | China | Iran | The Philippines | Taiwan |
|-------------------|-------|------|-----------------|--------|
| 2020-21-01        | 440   |      |                 |        |
| 2020-22-01        | 131   |      |                 |        |
| 2020-23-01        | 259   |      |                 |        |
| 2020-24-01        | 457   |      |                 |        |
| 2020-25-01        | 688   |      |                 |        |
| 2020-26-01        | 769   |      |                 |        |
| 2020-27-01        | 1771  |      |                 |        |
| 2020-28-01        | 1459  |      |                 |        |
| 2020-29-01        | 1737  |      |                 |        |
| 2020-30-01        | 1981  |      |                 |        |
| 2020-31-01        | 2099  |      |                 |        |
| 2020-01-02        | 2589  |      |                 |        |
| 2020-02-02        | 2825  |      |                 |        |
| 2020-03-02        | 3235  |      |                 |        |
| 2020-04-02        | 3884  |      |                 |        |
| 2020-05-02        | 3694  |      |                 |        |
| 2020-06-02        | 3143  |      |                 |        |
| 2020-07-02        | 3385  |      |                 |        |
| 2020-08-02        | 2652  |      |                 |        |
| 2020-09-02        | 2973  |      |                 |        |
| 2020-10-02        | 2467  |      |                 |        |
| 2020-11-02        | 2015  |      |                 |        |
| 2020-12-02        | 14108 |      |                 |        |
| 2020-13-02        | 5090  |      |                 |        |
| 2020-14-02        | 2641  |      |                 |        |
| 2020-15-02        | 2008  |      | 3               | 18     |
| 2020-16-02        | 2048  |      |                 | 2      |
| 2020-17-02        | 1888  |      |                 | 2      |
| 2020-18-02        | 1749  |      |                 |        |
| 2020-19-02        | 382   | 2    |                 | 1      |
| 2020-20-02        | 898   | 3    |                 | 1      |
| 2020-21-02        | 823   | 13   |                 | 2      |
| 2020-22-02        | 648   | 11   |                 |        |
| 2020-23-02        | 214   | 14   |                 | 2      |



|            |     |      |     |    |
|------------|-----|------|-----|----|
| 2020-24-02 | 508 | 18   |     | 2  |
| 2020-25-02 | 406 | 34   |     | 1  |
| 2020-26-02 | 433 | 44   |     | 1  |
| 2020-27-02 | 327 | 106  |     |    |
| 2020-28-02 | 427 | 143  |     | 2  |
| 2020-29-02 | 573 | 205  |     | 5  |
| 2020-01-03 | 202 | 385  |     | 1  |
| 2020-02-03 | 125 | 523  |     | 1  |
| 2020-03-03 | 119 | 835  |     | 1  |
| 2020-04-03 | 139 | 586  |     |    |
| 2020-05-03 | 143 | 591  |     | 2  |
| 2020-06-03 | 99  | 1234 | 2   | 1  |
| 2020-07-03 | 44  | 1076 | 1   |    |
| 2020-08-03 | 40  | 743  | 4   |    |
| 2020-09-03 | 19  | 595  | 14  |    |
| 2020-10-03 | 24  | 881  | 9   | 2  |
| 2020-11-03 | 15  | 958  | 16  | 1  |
| 2020-12-03 | 20  | 1075 | 3   | 1  |
| 2020-13-03 | 11  | 1289 | 12  | 1  |
| 2020-14-03 | 20  | 1365 | 47  | 3  |
| 2020-15-03 | 16  | 1209 | 29  | 6  |
| 2020-16-03 | 21  | 1053 | 2   | 8  |
| 2020-17-03 | 13  | 1178 | 45  | 10 |
| 2020-18-03 | 34  | 1192 | 15  | 23 |
| 2020-19-03 | 39  | 1046 | 15  | 8  |
| 2020-20-03 | 41  | 1237 | 13  | 27 |
| 2020-21-03 | 46  | 966  | 77  | 8  |
| 2020-22-03 | 39  | 1028 | 73  | 26 |
| 2020-23-03 | 78  | 1411 | 82  | 26 |
| 2020-24-03 | 47  | 1762 | 90  | 21 |
| 2020-25-03 | 67  | 2206 | 84  | 19 |
| 2020-26-03 | 55  | 2389 | 71  | 17 |
| 2020-27-03 | 54  | 2926 | 96  | 15 |
| 2020-28-03 | 45  | 3076 | 272 | 16 |
| 2020-29-03 | 0   | 2901 | 343 | 15 |
| 2020-30-03 | 79  | 3186 | 128 | 8  |
| 2020-31-03 | 36  | 3110 | 538 | 16 |
| 2020-01-04 | 35  | 2988 | 227 | 7  |
| 2020-02-04 | 31  | 2875 | 322 | 10 |
| 2020-03-04 | 19  | 2715 | 385 | 9  |
| 2020-04-04 | 30  | 2560 | 76  | 7  |
| 2020-05-04 | 39  | 2483 | 152 | 8  |
| 2020-06-04 | 32  | 2274 | 414 | 10 |
| 2020-07-04 | 62  | 2089 | 104 | 3  |
| 2020-08-04 | 63  | 1997 | 106 | 3  |
| 2020-09-04 | 42  | 1634 | 206 | 1  |
| 2020-10-04 | 46  | 1972 | 119 | 2  |

Daily cases

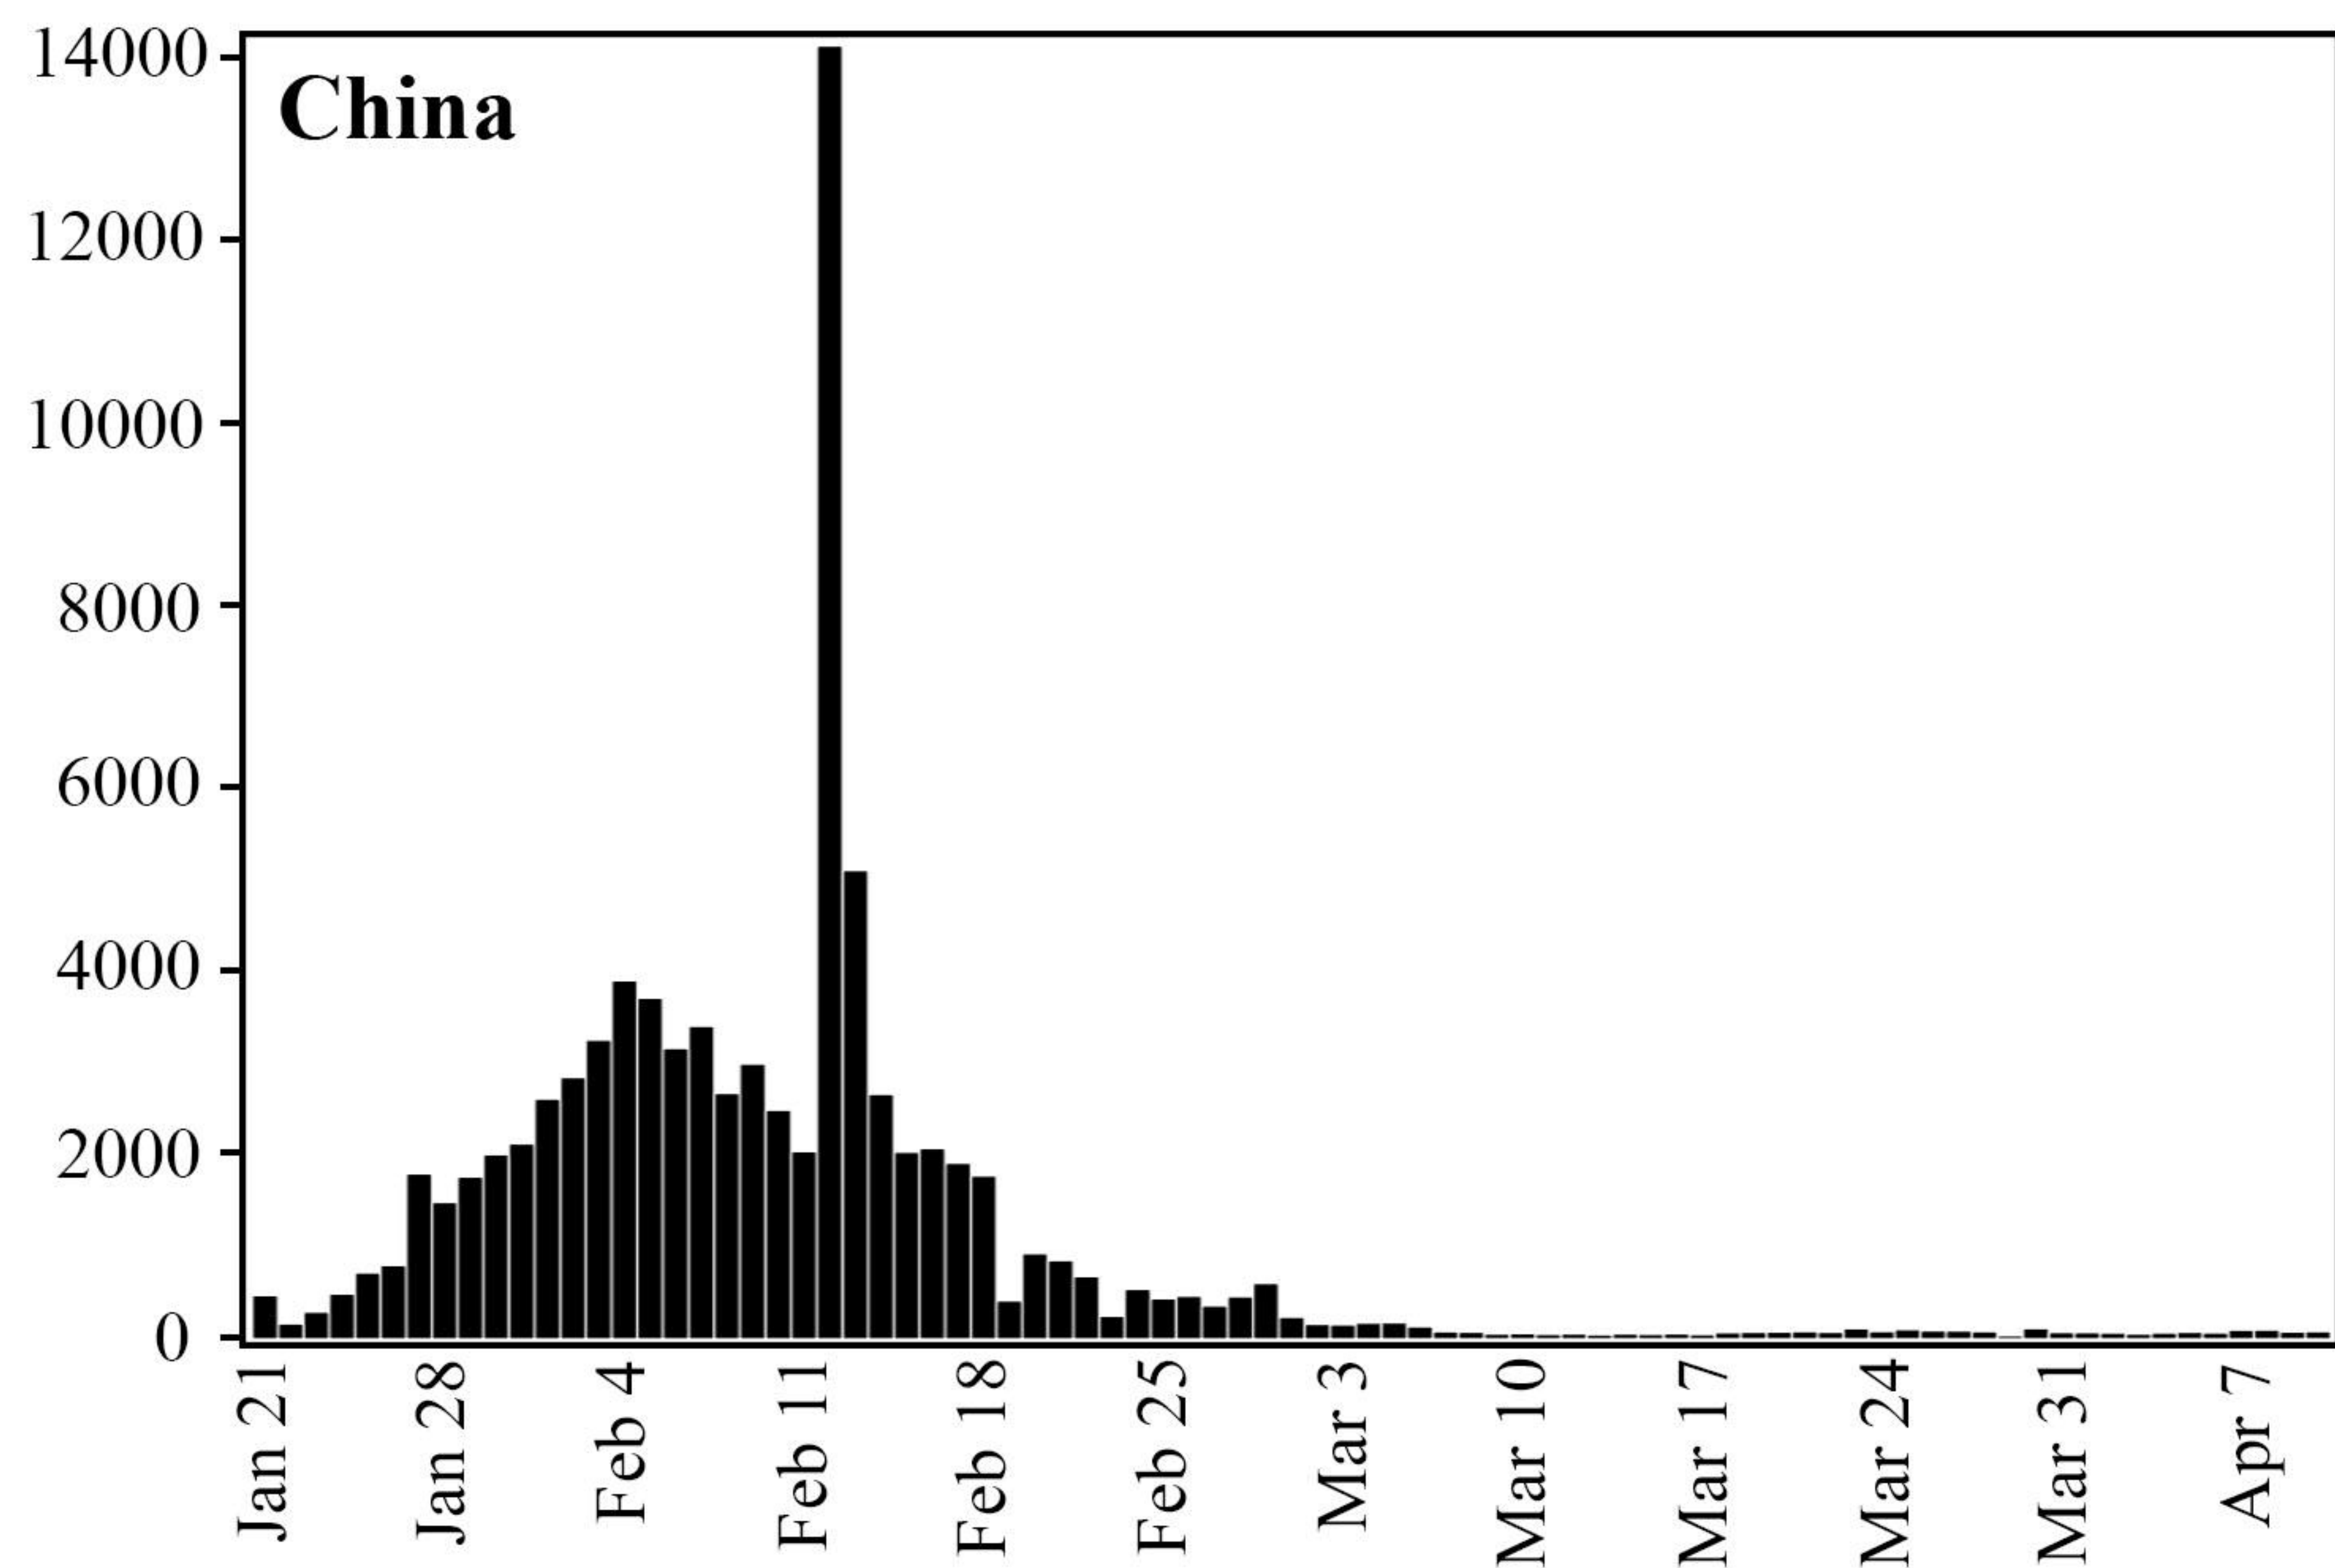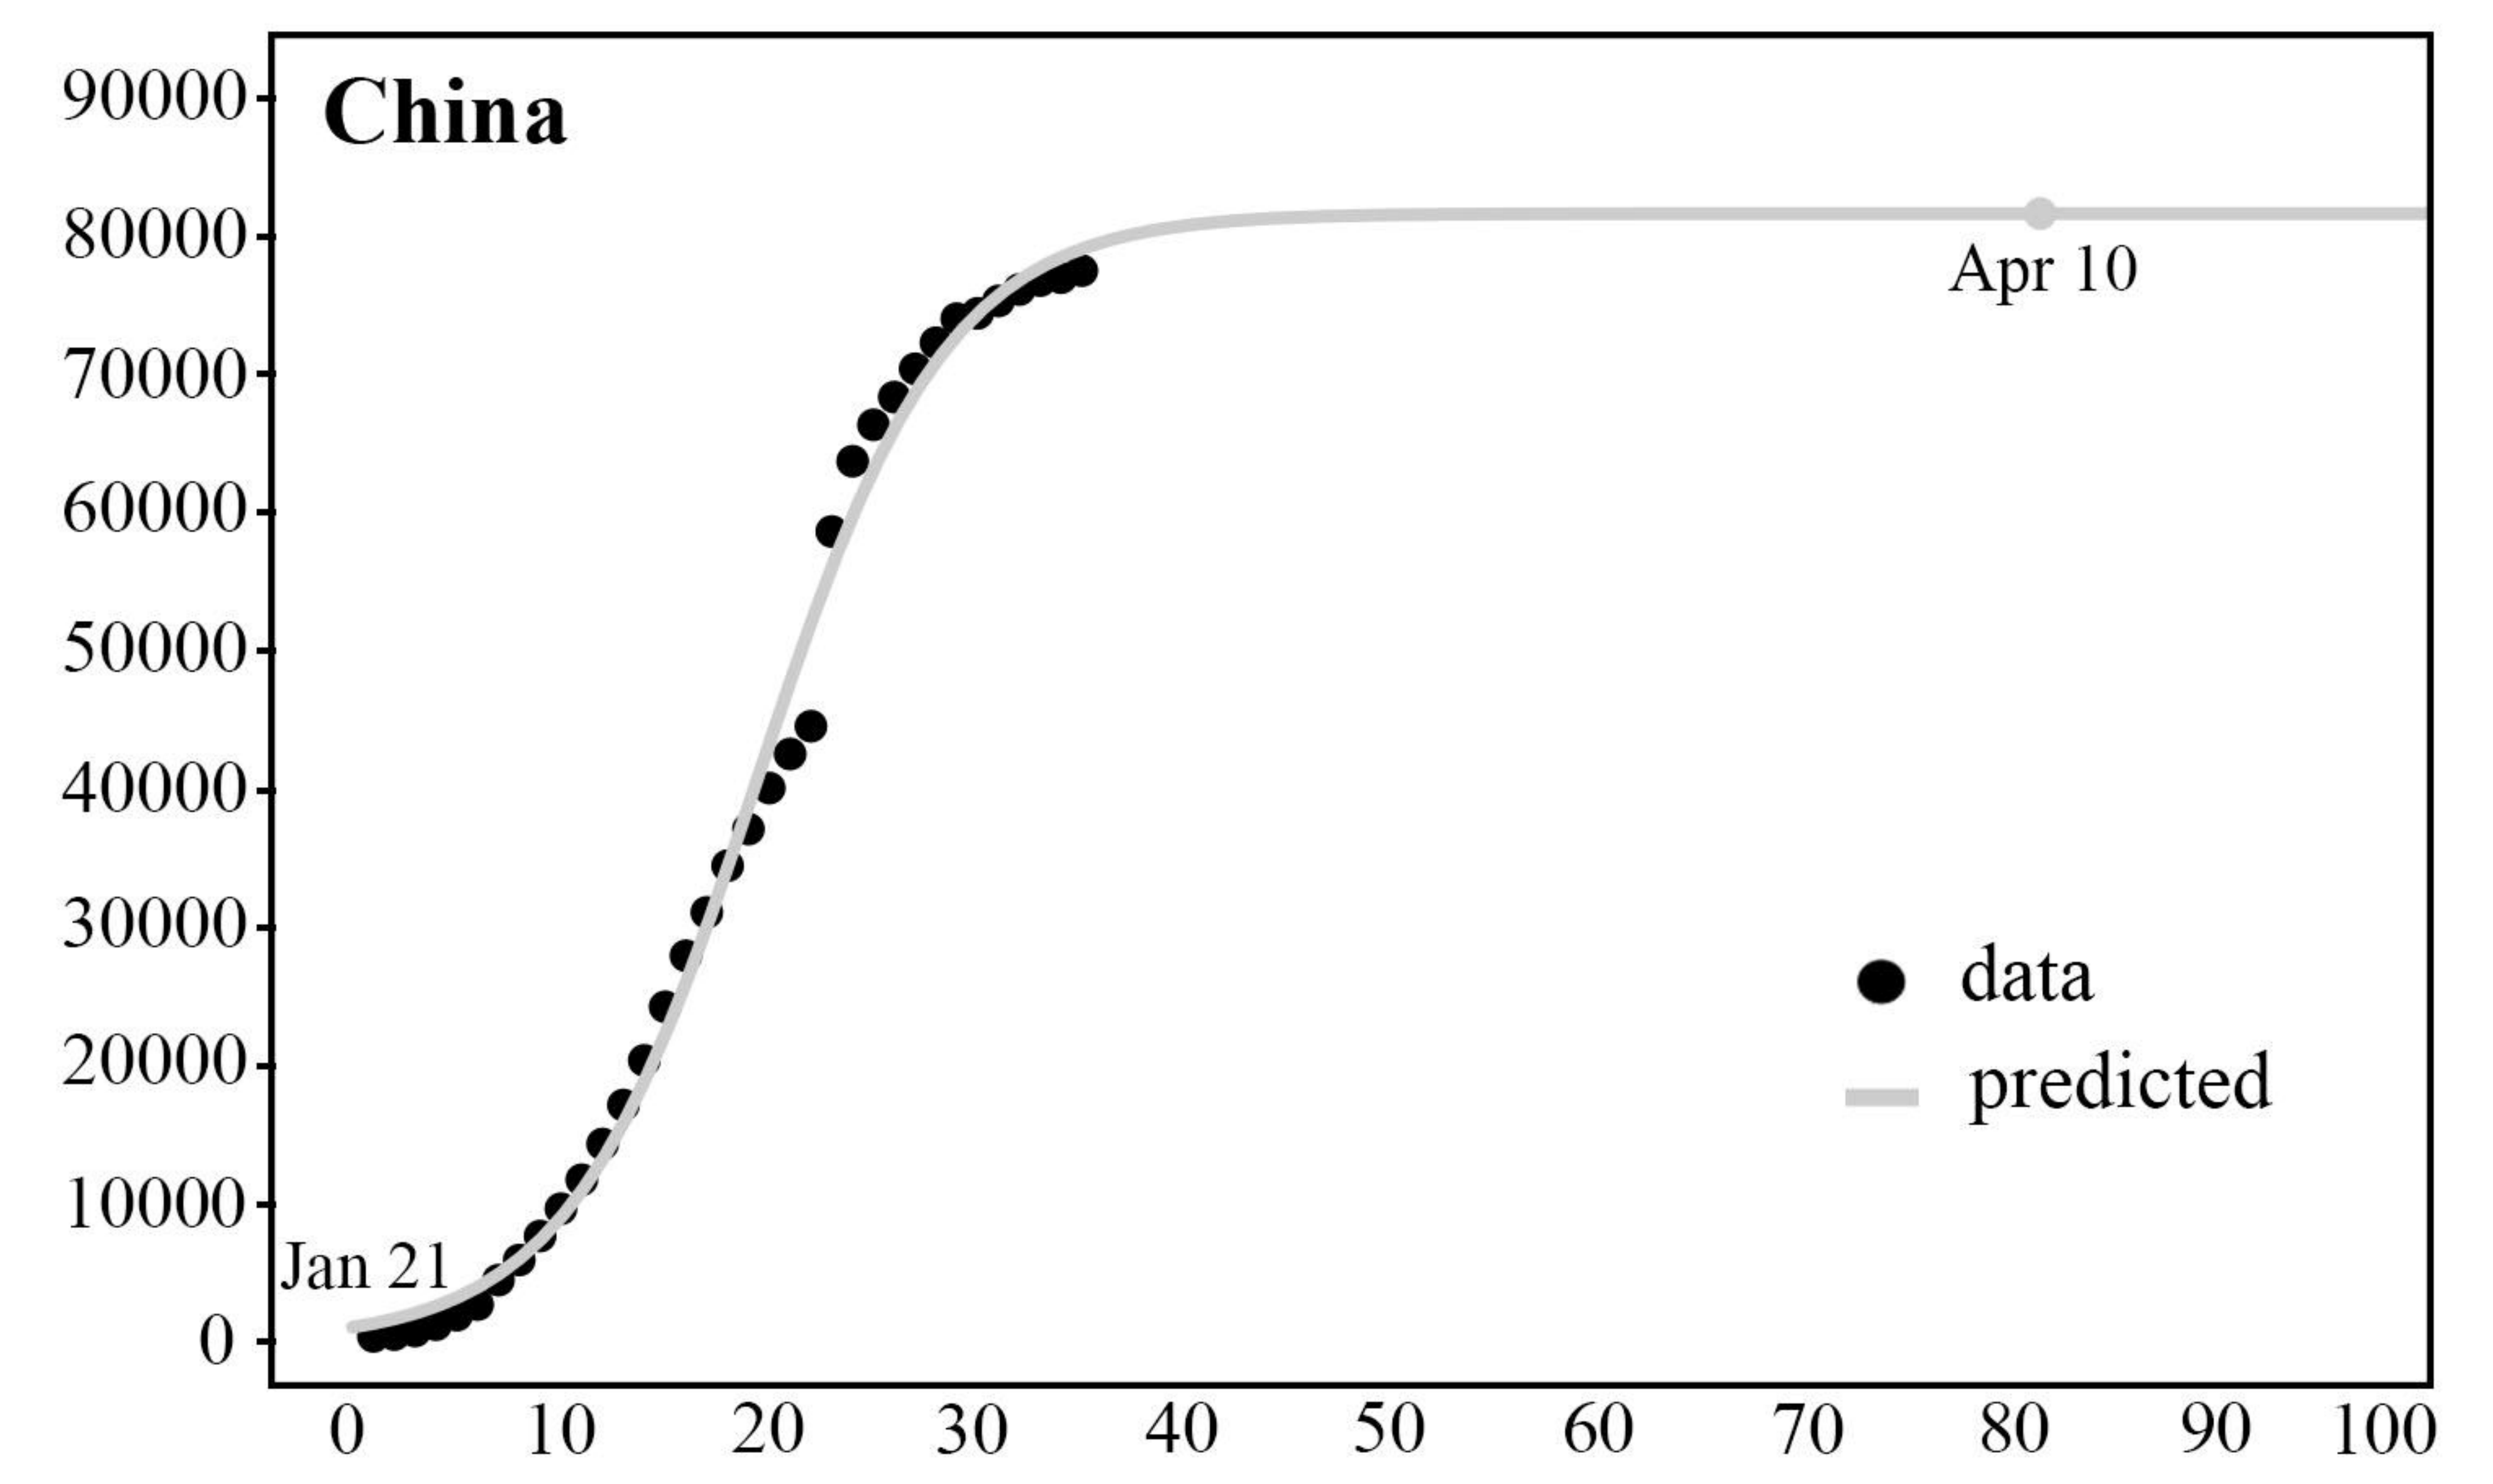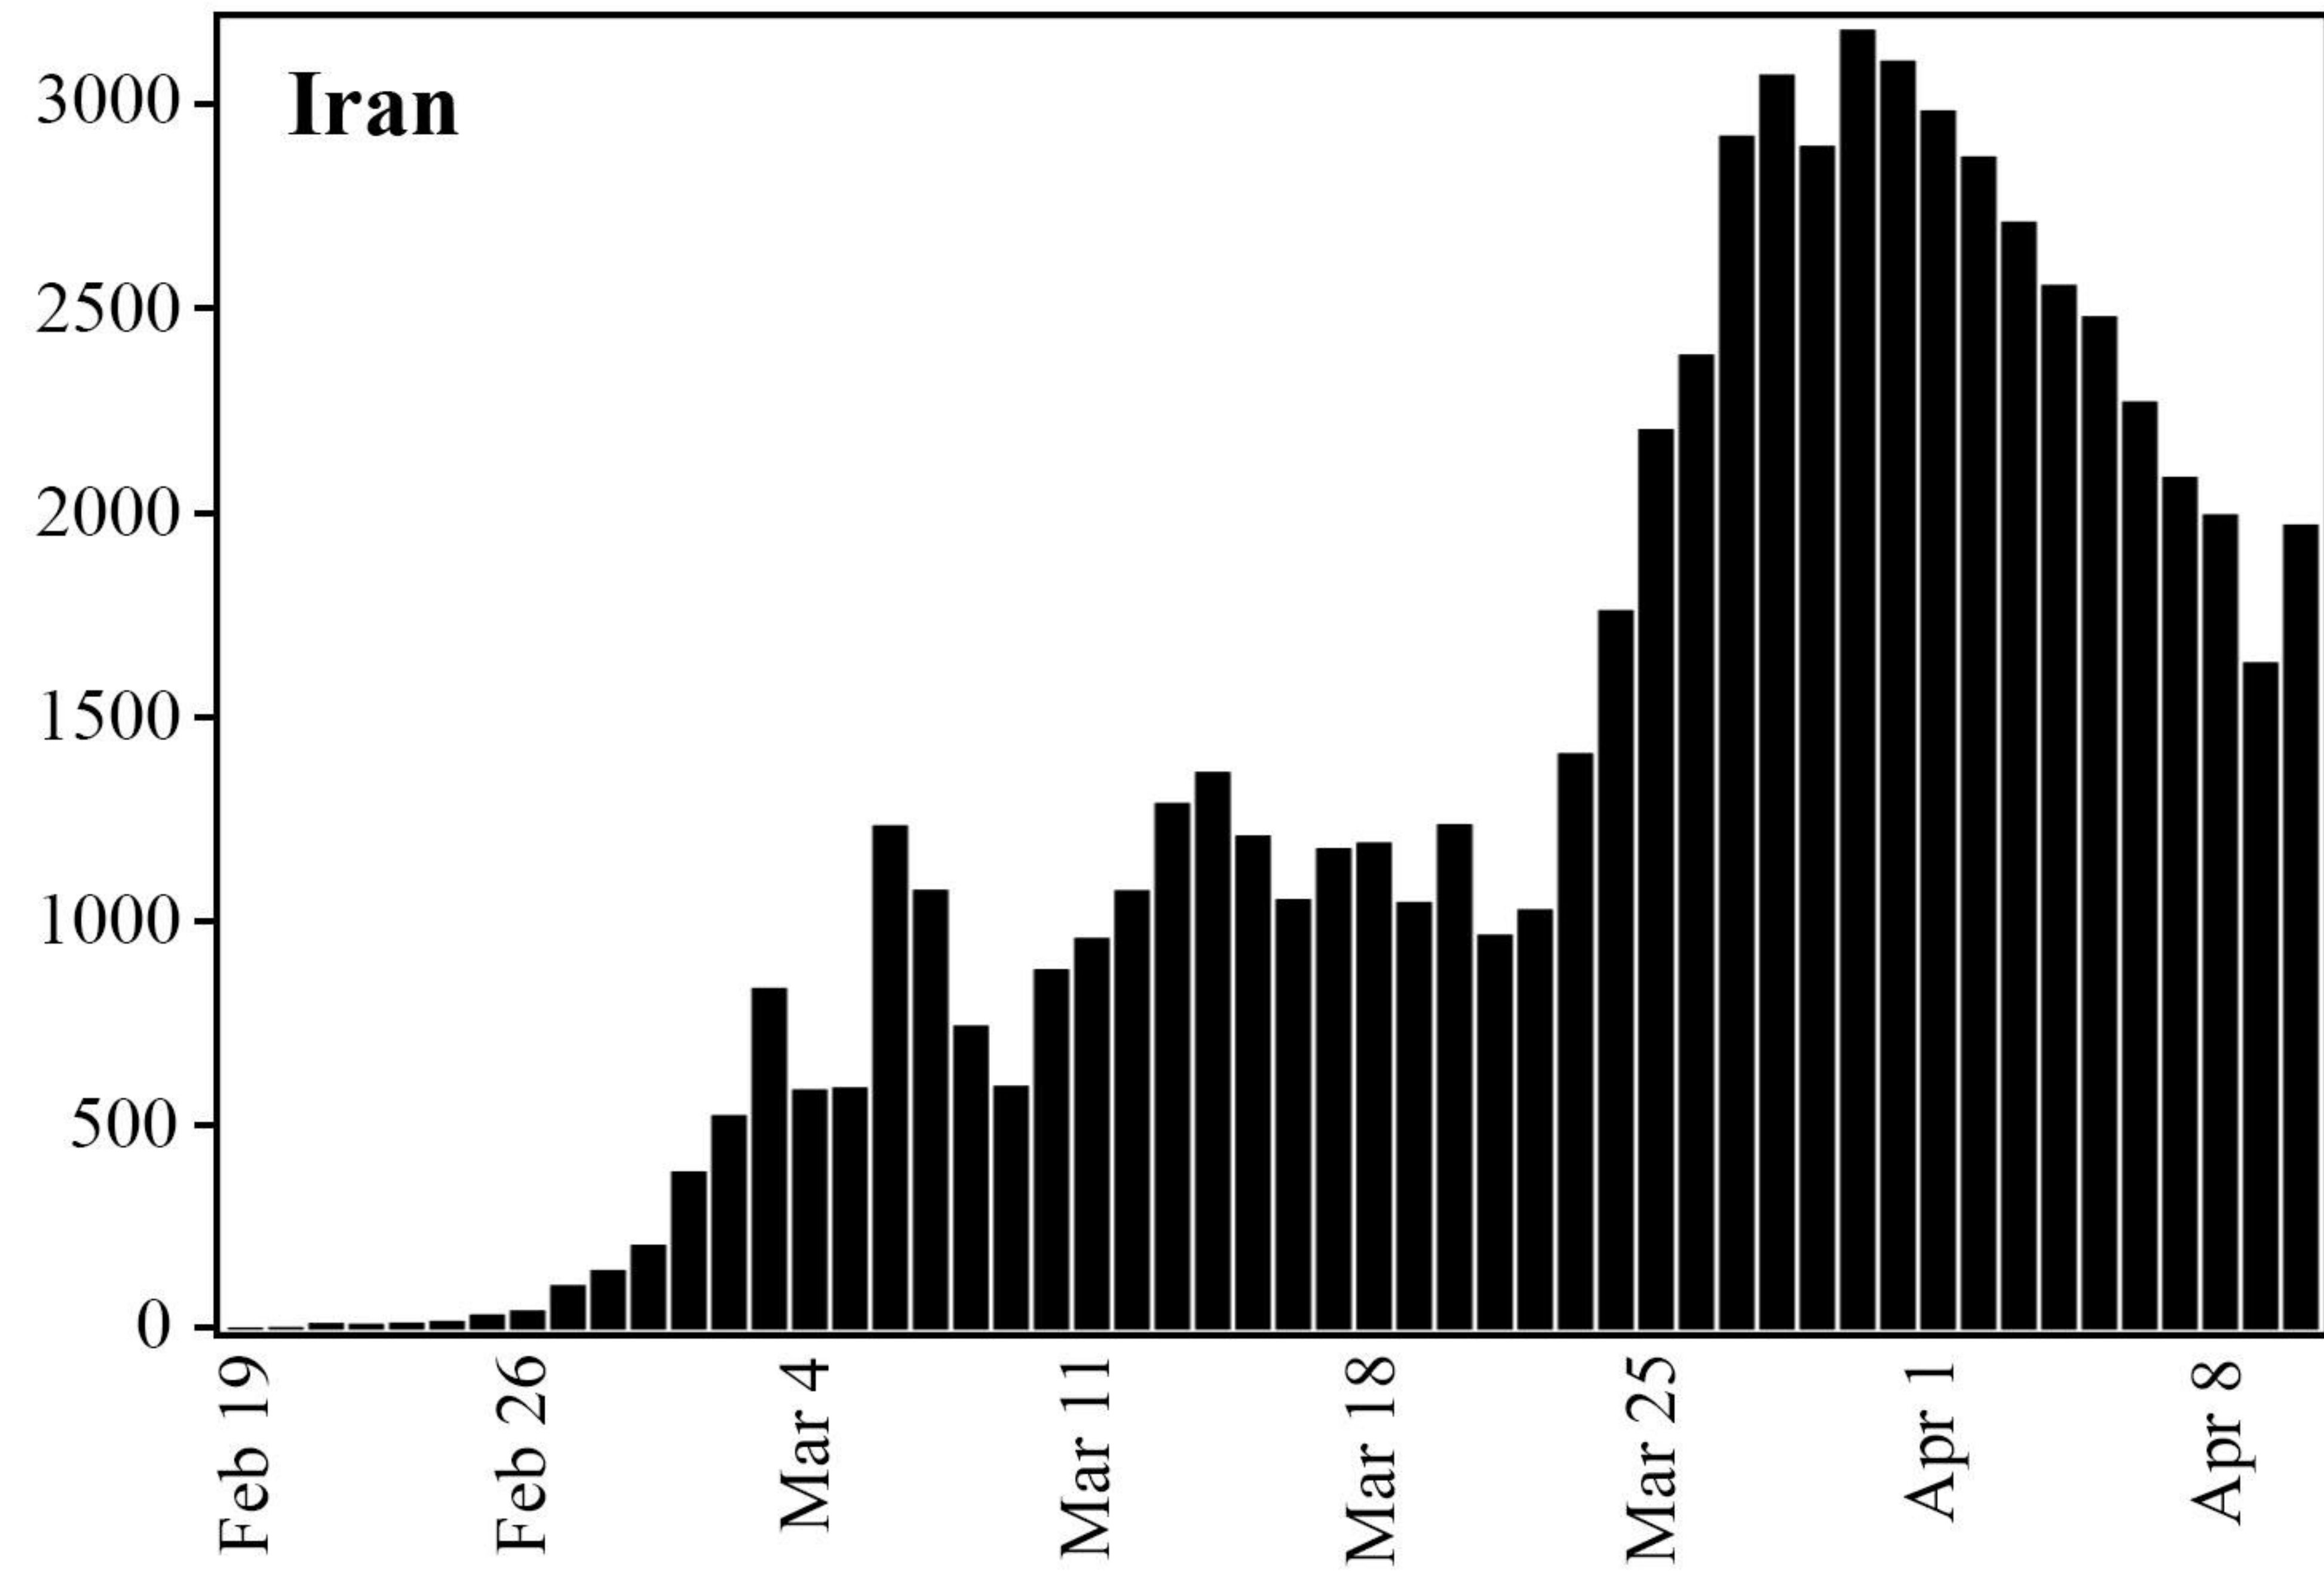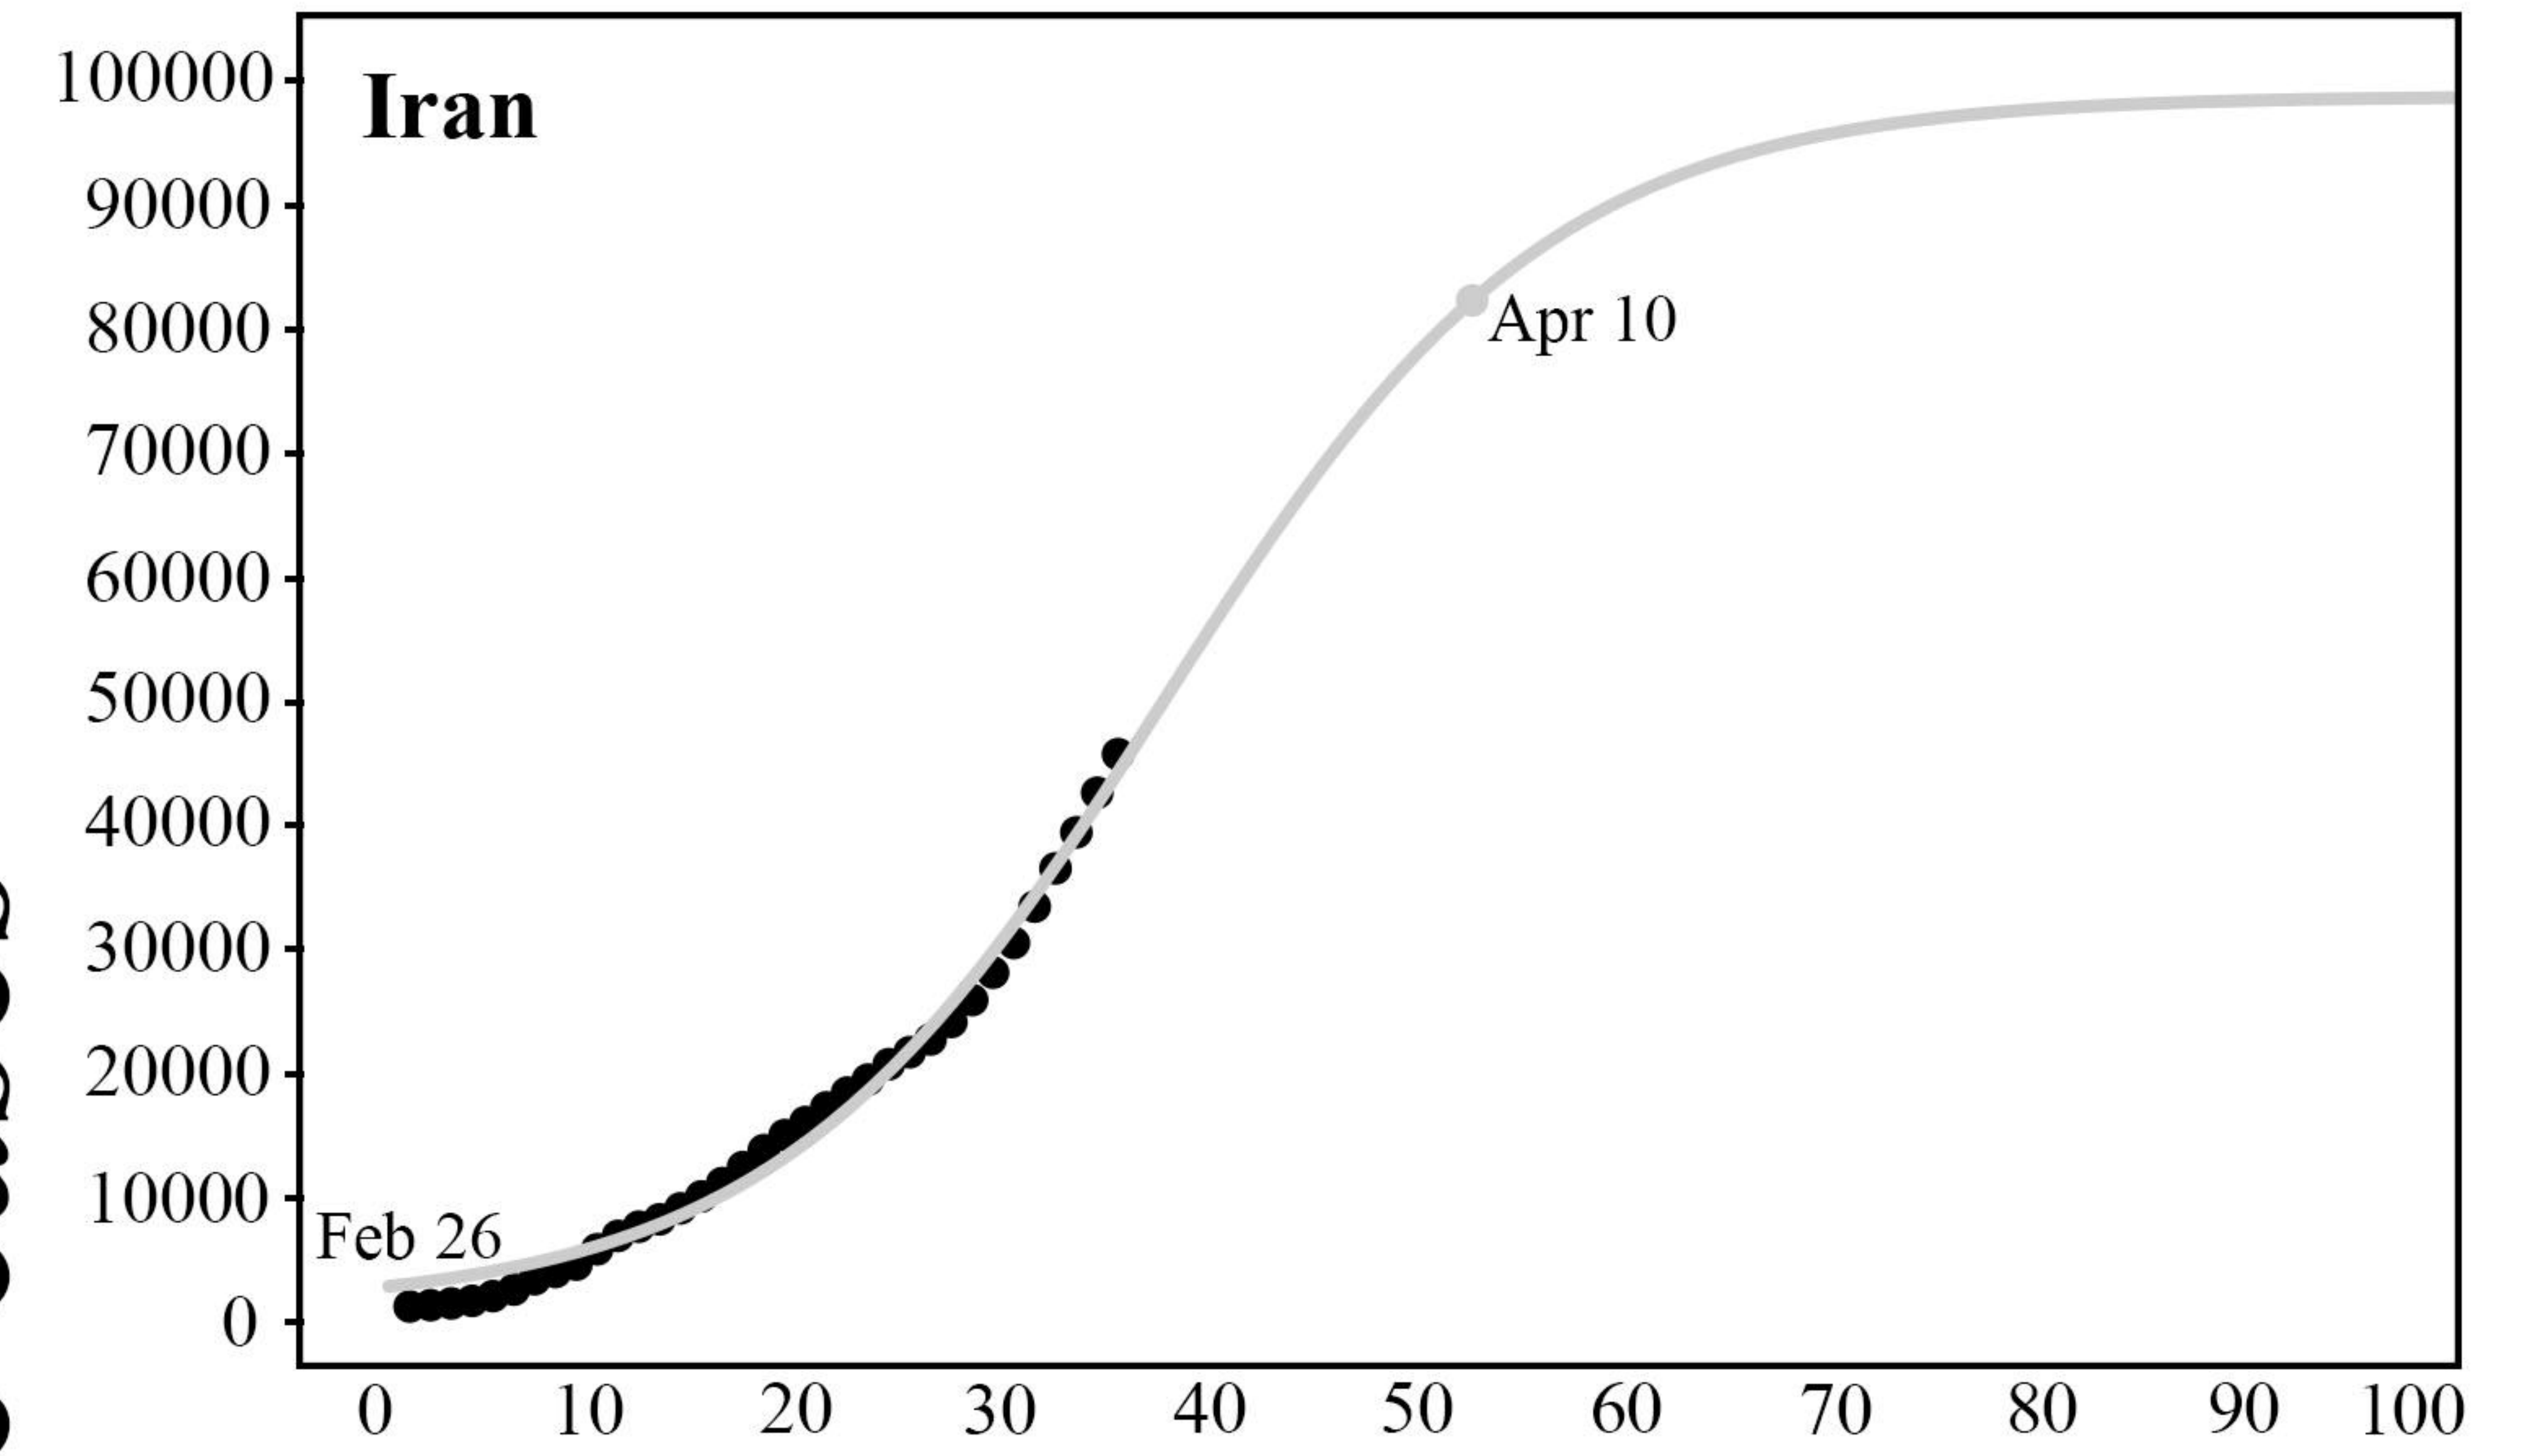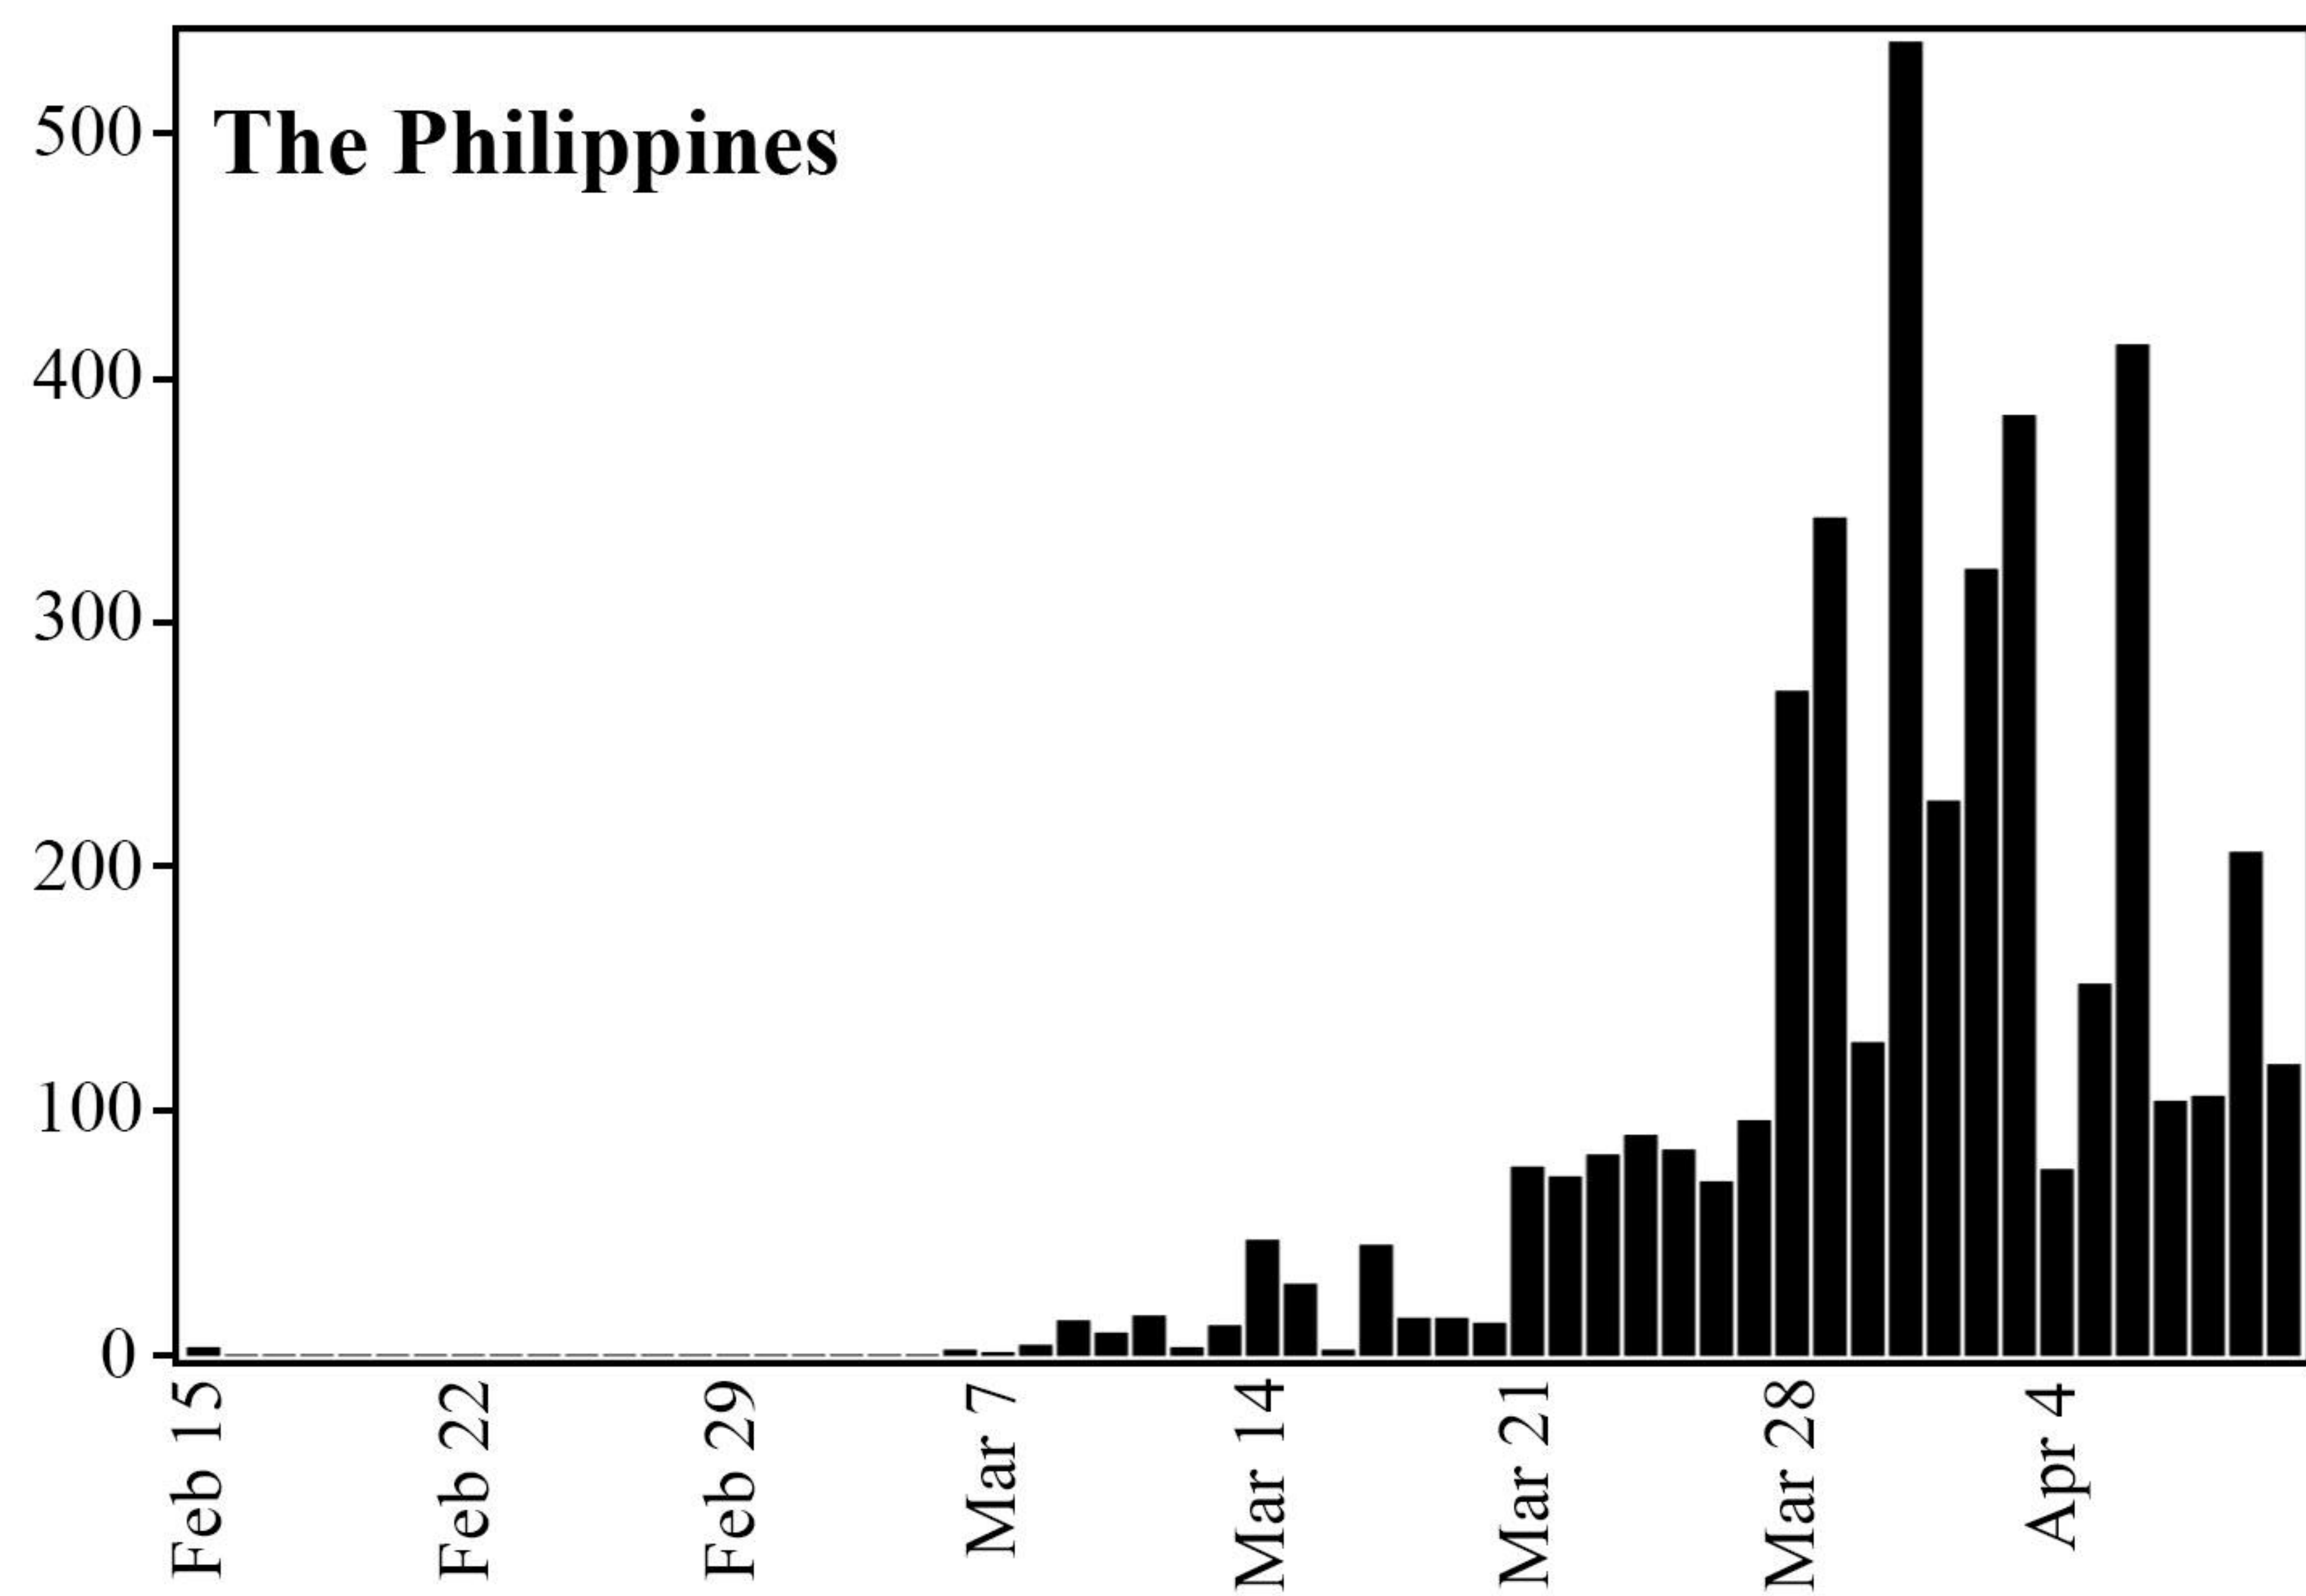

Cumulative cases

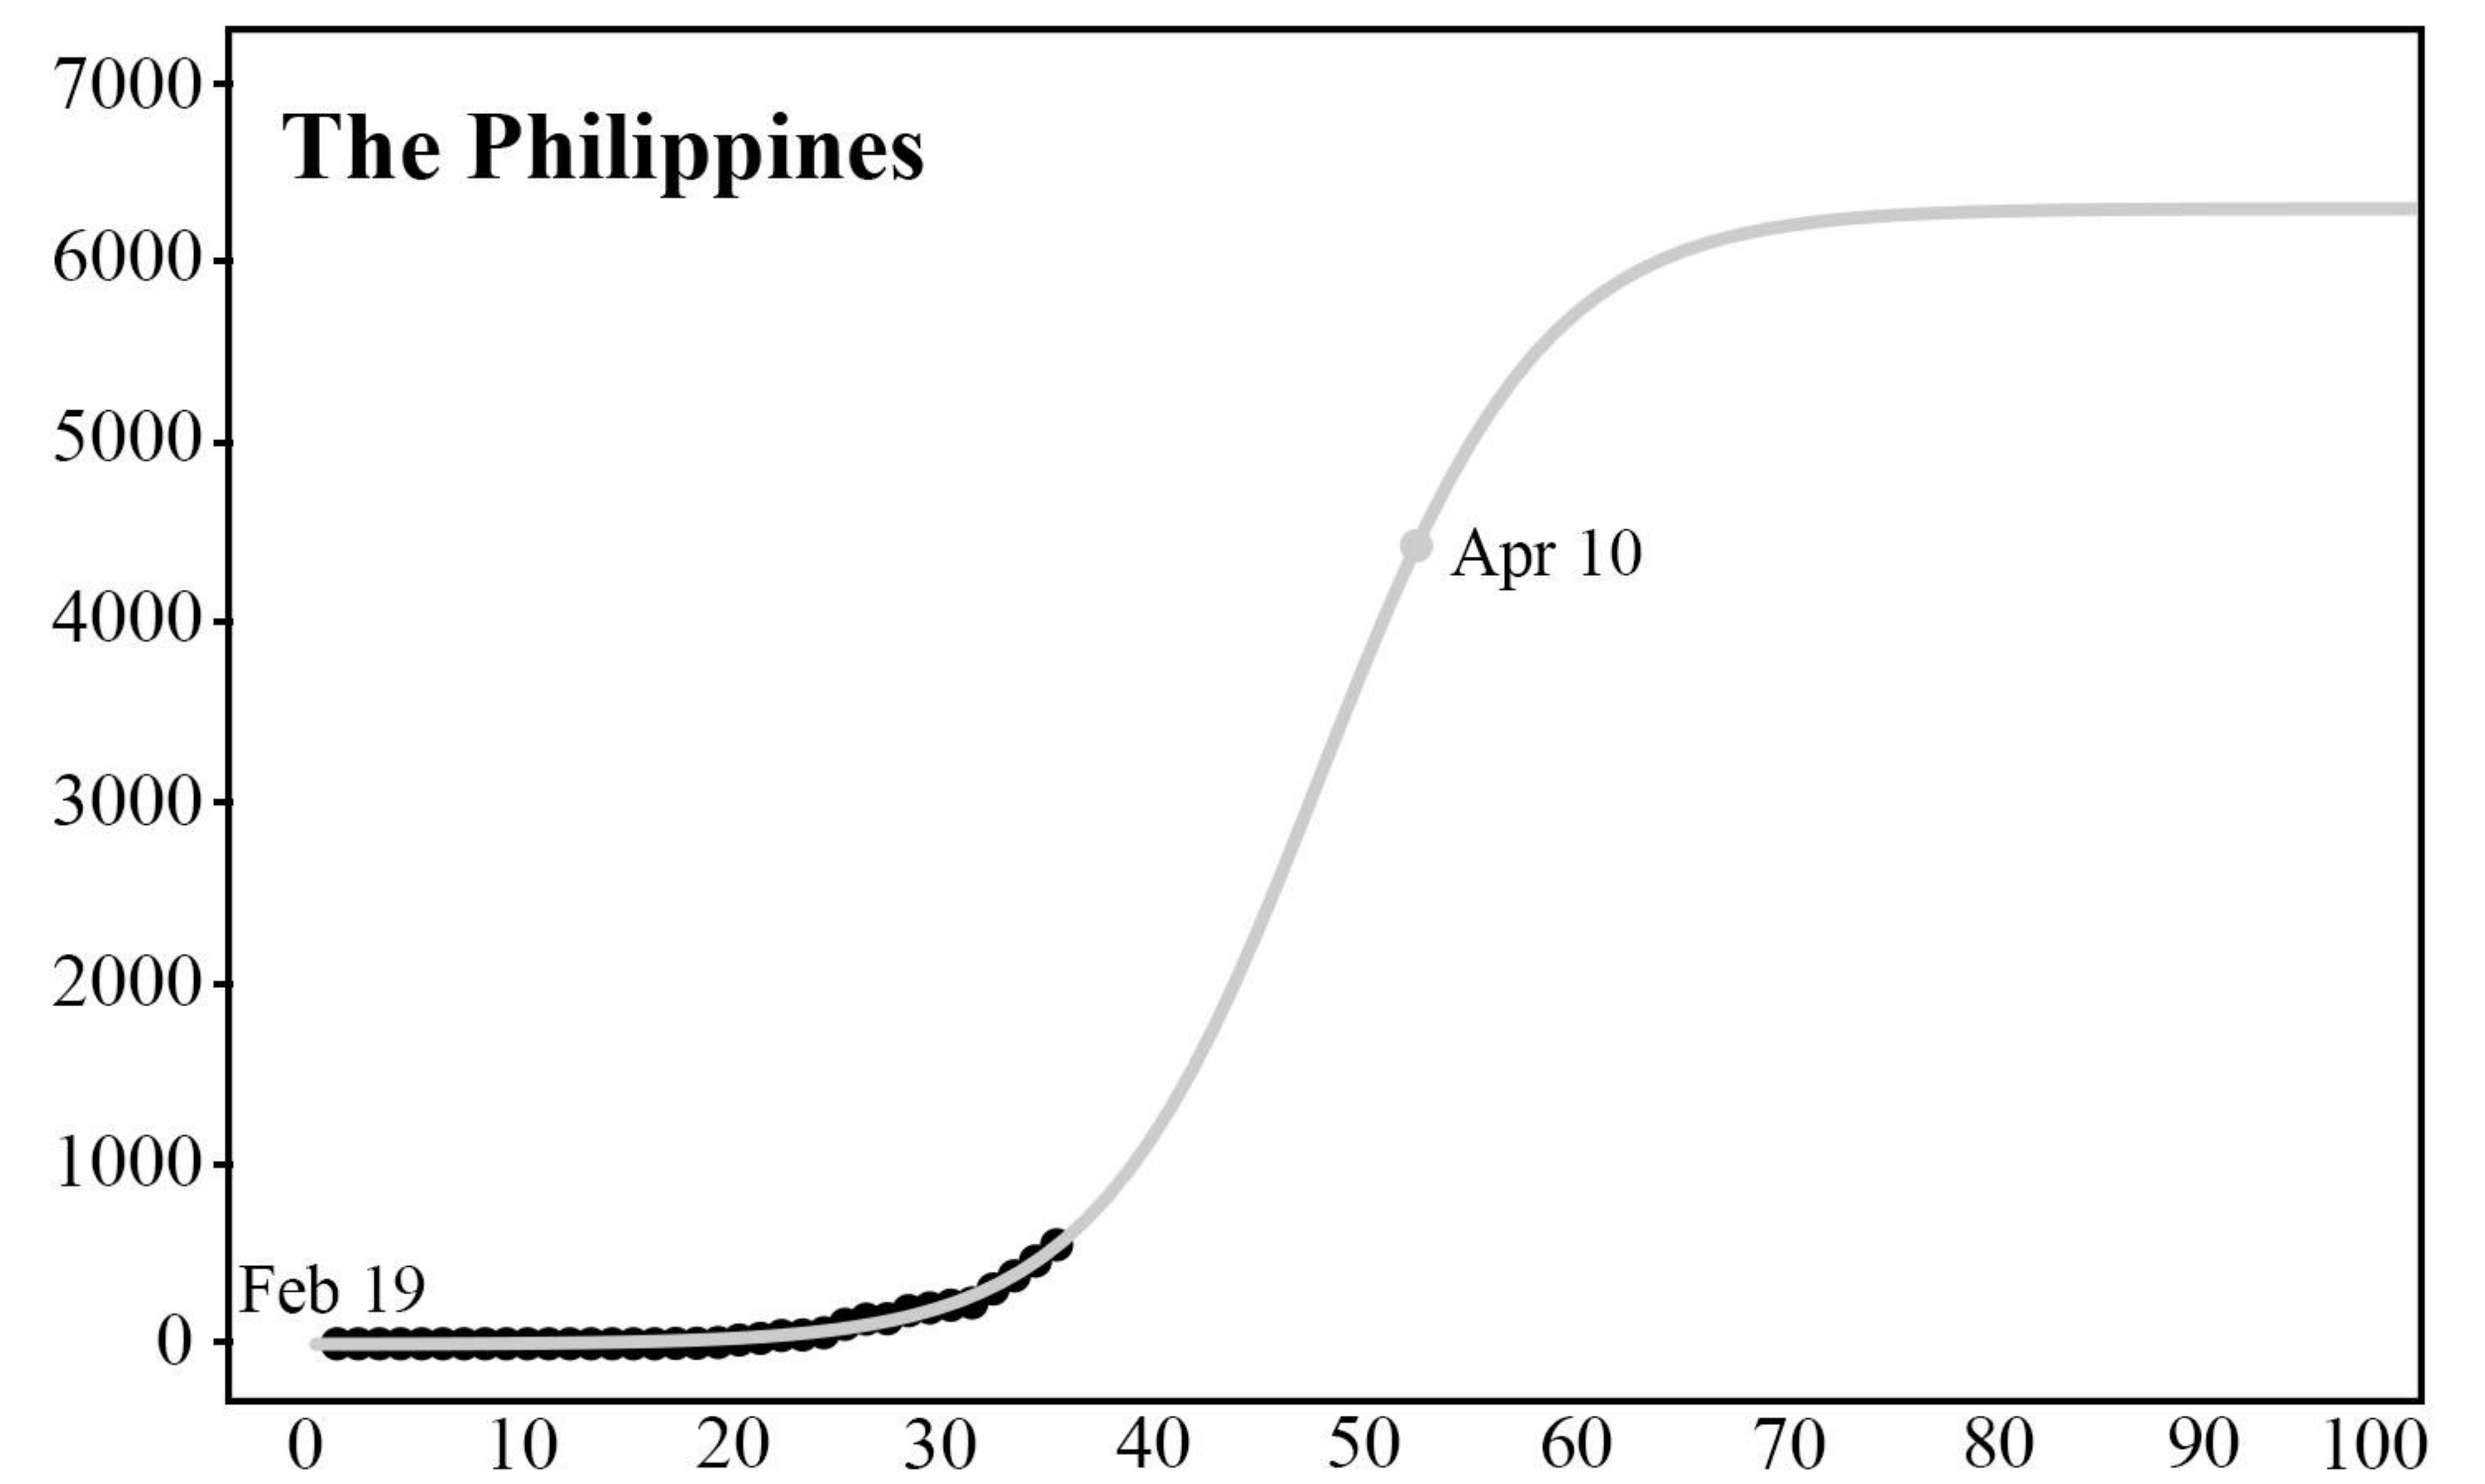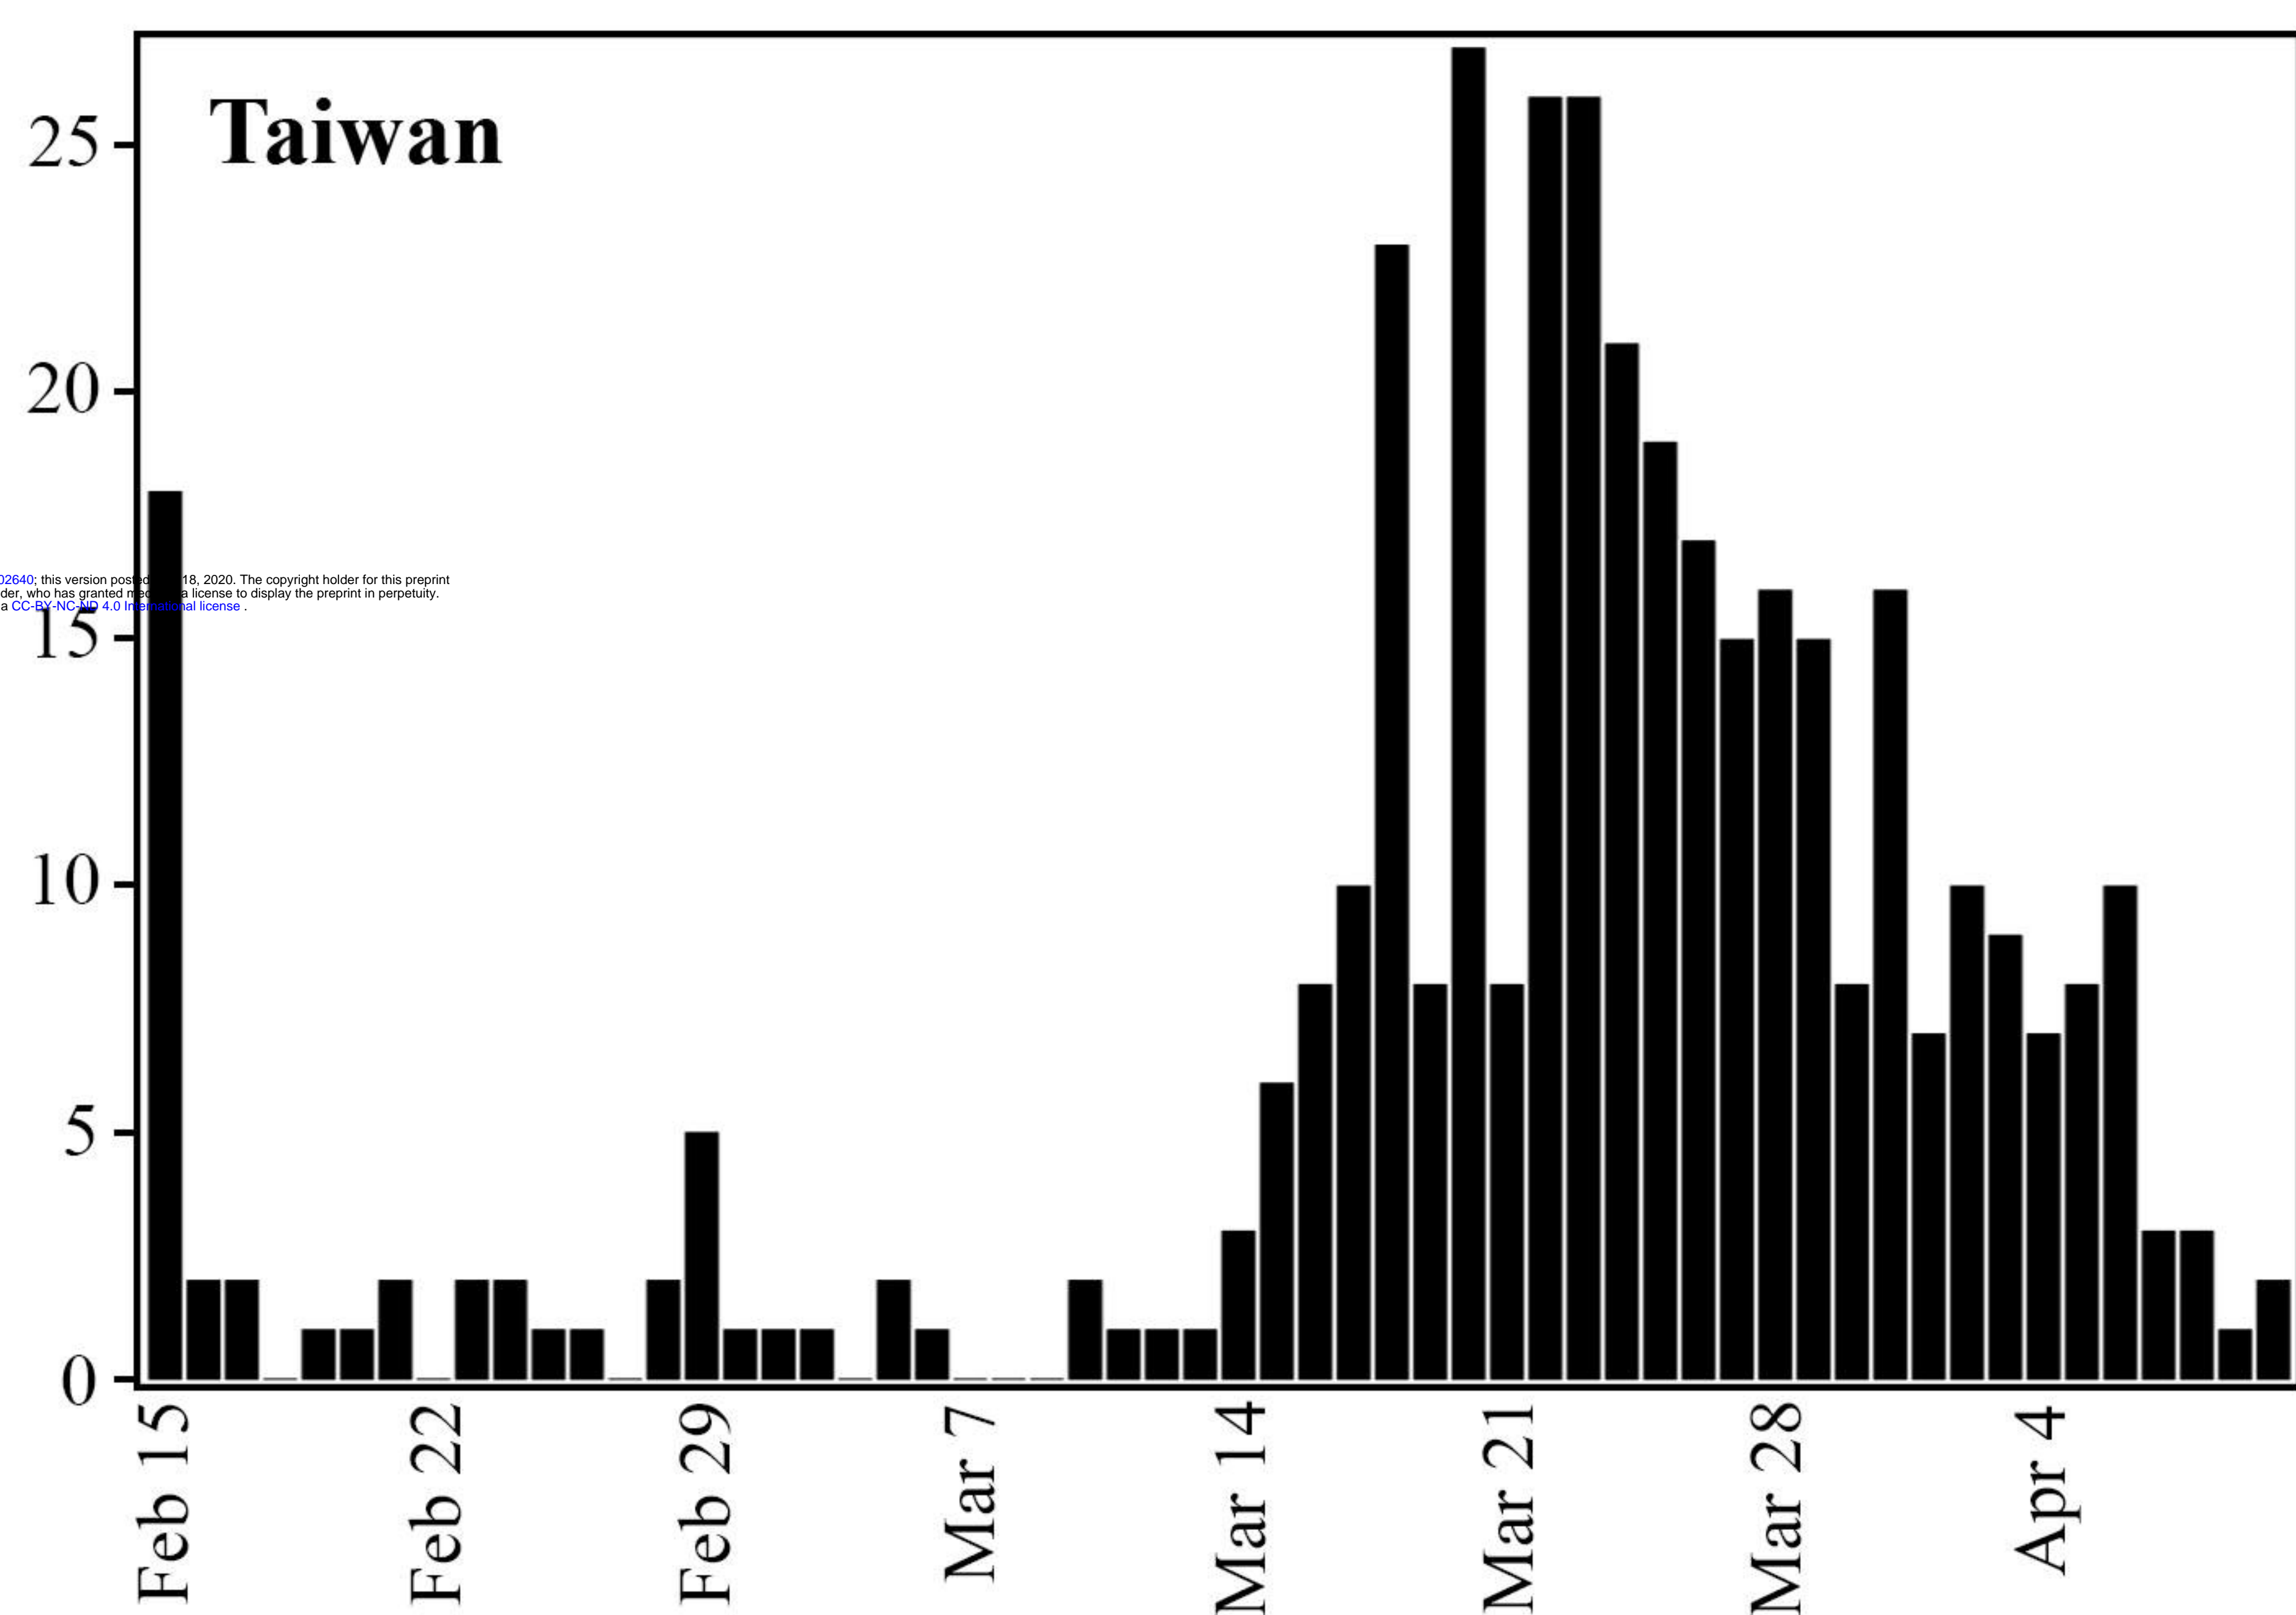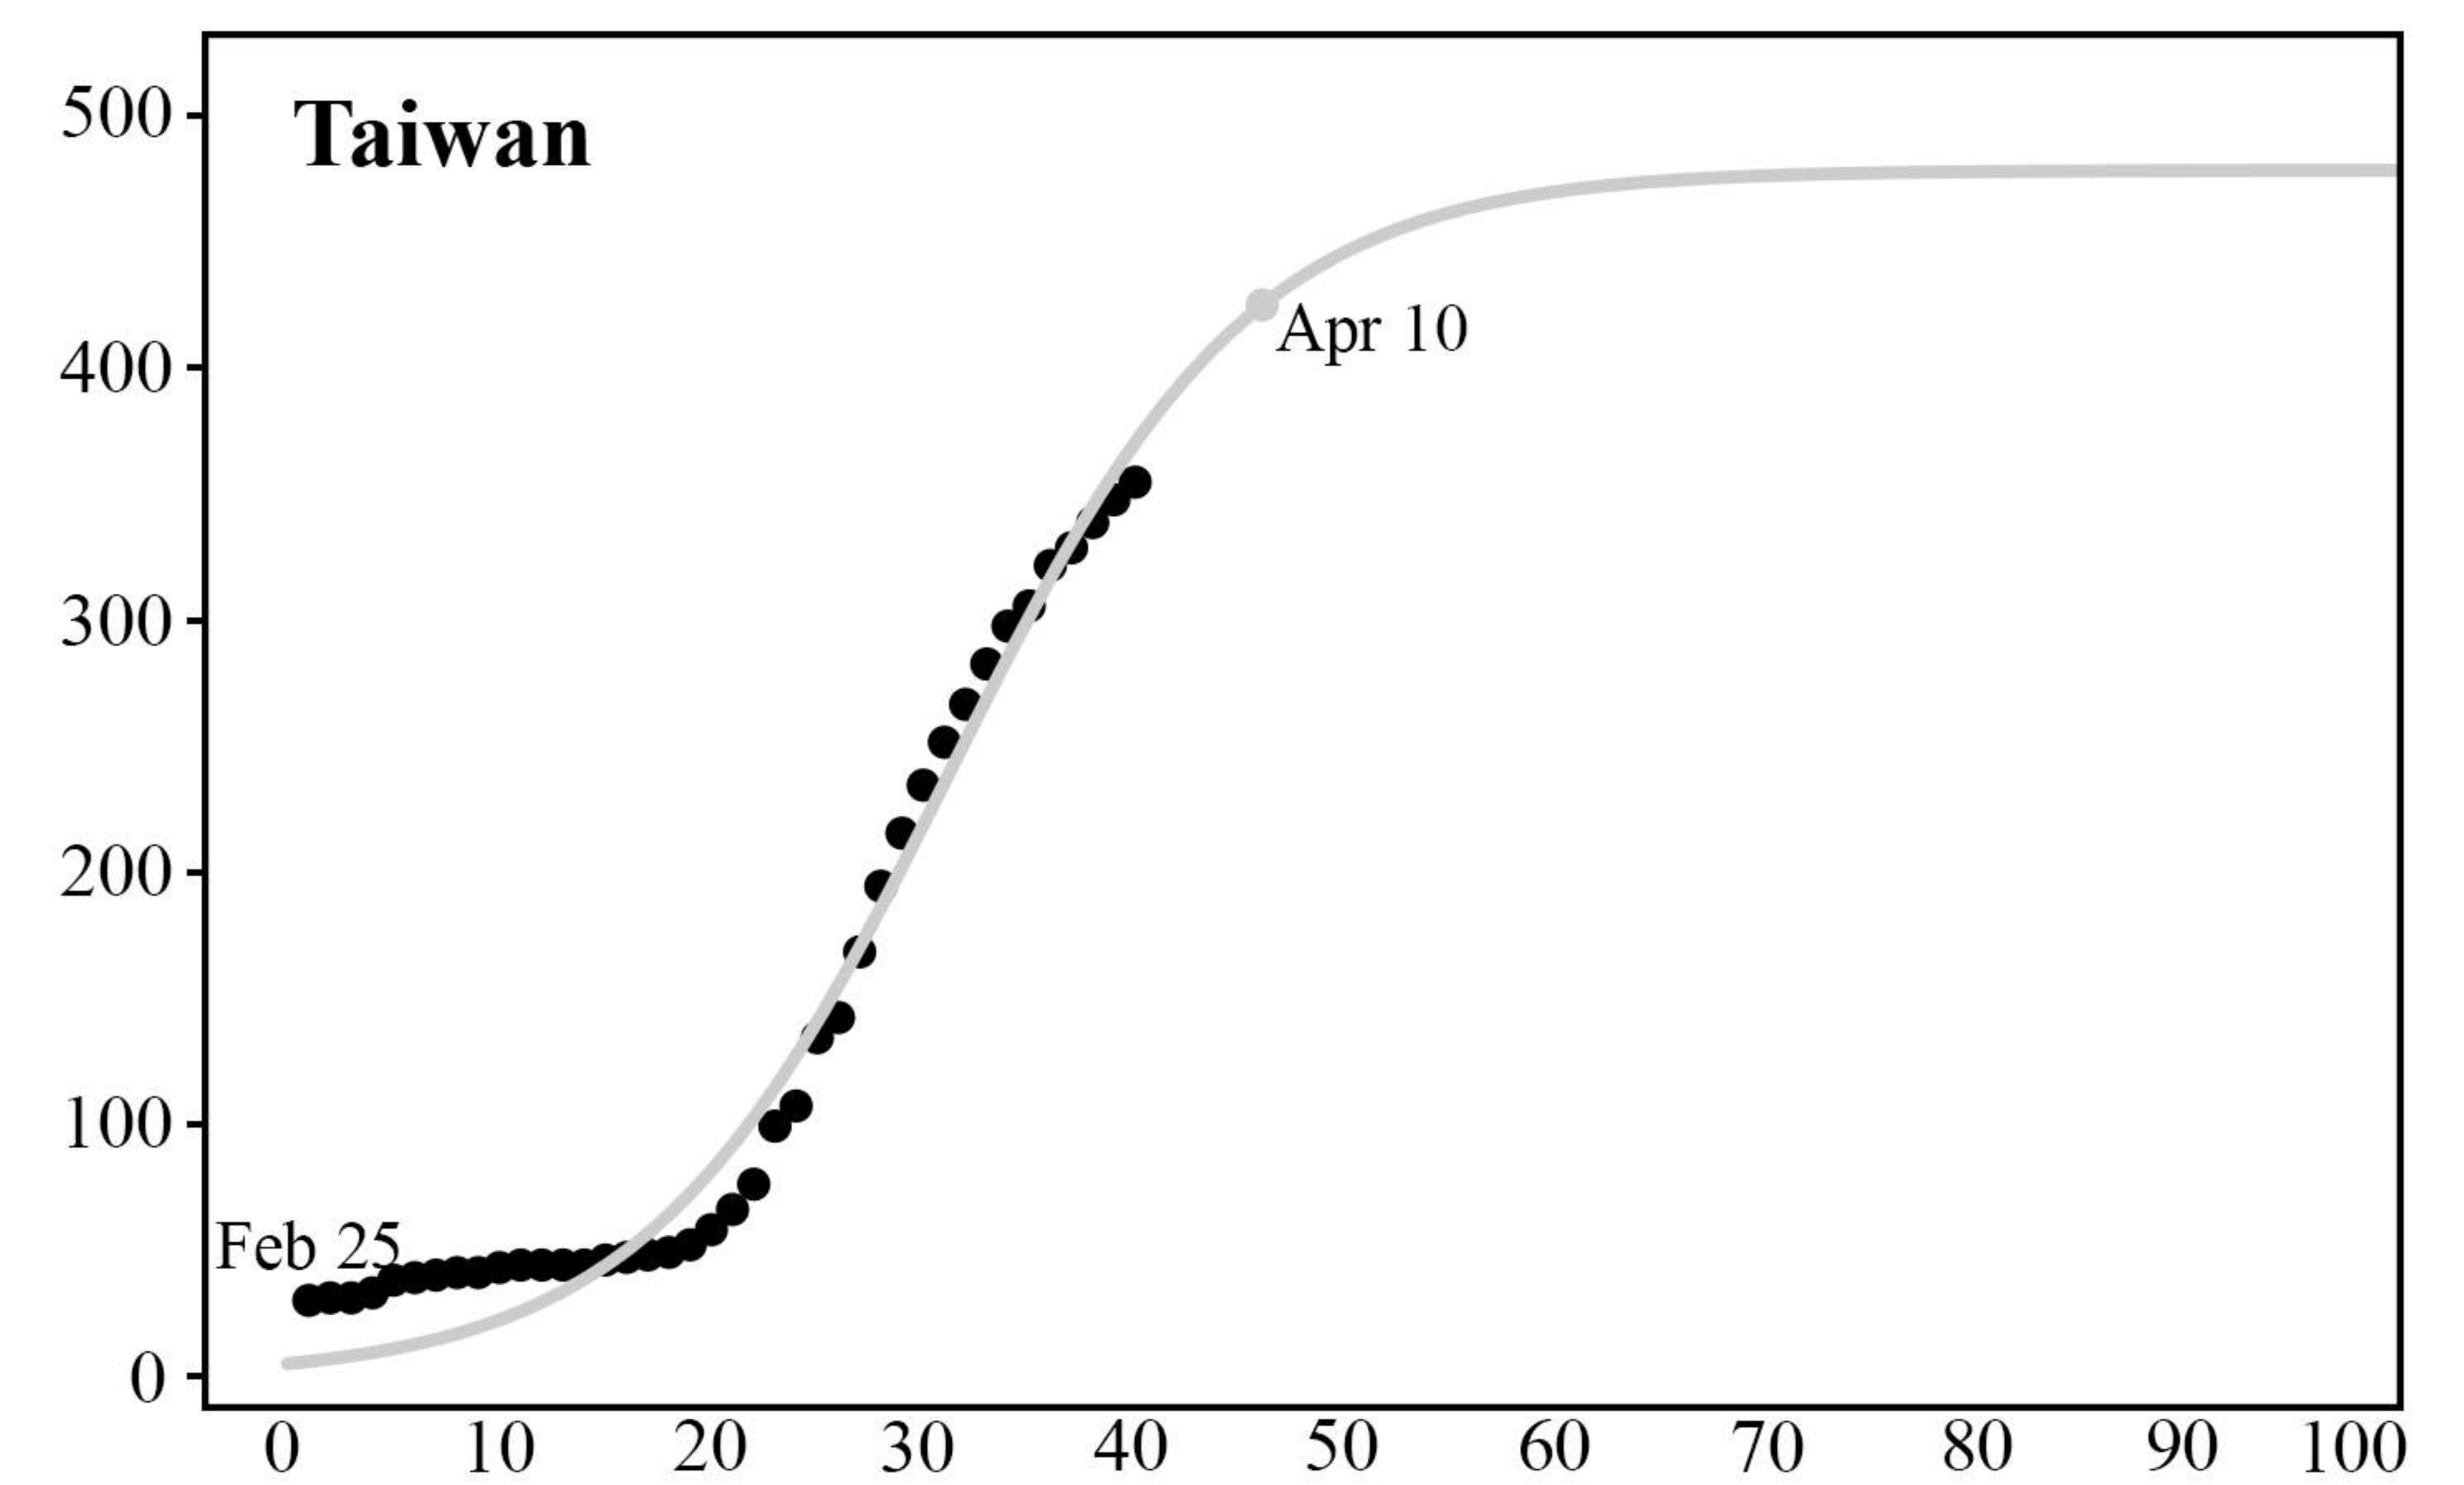

Date

Day

medRxiv preprint doi: <https://doi.org/10.1101/2020.04.15.20102943>; this version posted April 16, 2020. The copyright holder for this preprint (which was not certified by peer review) is the author/funder, who has granted medRxiv a license to display the preprint in perpetuity. It is made available under aCC-BY 4.0 International license.
